# Supplementary material for: The Mid-Cretaceous Tectonothermal Evolution of the Zhangbaling Tectonic Belt, East China: Evidence from Zircon (U–Th)/He and Detrital Zircon U–Pb Dating
Source: MDPI journal article supplement (doi:10.3390/min13091142), 2023-08-30
Supplement: s1 [file s1]

Table S1: Detrital zircon LA ICP-MS U-Pb ages for the Cretaceous sandstones in the Zhangbaling tectonic belt

| spot                            | Th <sup>232</sup> U <sup>238</sup> |      | Th/U | Ratio                                |         |         |                                     |         |         |                                      |         | Age (Ma)±1σ |                                      |         |                                     |                                     |                                      |
|---------------------------------|------------------------------------|------|------|--------------------------------------|---------|---------|-------------------------------------|---------|---------|--------------------------------------|---------|-------------|--------------------------------------|---------|-------------------------------------|-------------------------------------|--------------------------------------|
|                                 | ppm                                |      |      | <sup>207</sup> Pb/ <sup>206</sup> Pb |         | ±1σ     | <sup>207</sup> Pb/ <sup>235</sup> U |         | ±1σ     | <sup>208</sup> Pb/ <sup>232</sup> Th |         | ±1σ         | <sup>207</sup> Pb/ <sup>206</sup> Pb |         | <sup>207</sup> Pb/ <sup>235</sup> U | <sup>206</sup> Pb/ <sup>238</sup> U | <sup>208</sup> Pb/ <sup>232</sup> Th |
|                                 |                                    |      |      |                                      |         |         |                                     |         |         |                                      |         |             |                                      |         |                                     |                                     |                                      |
| 9121 zircon U-Pb dating results |                                    |      |      |                                      |         |         |                                     |         |         |                                      |         |             |                                      |         |                                     |                                     |                                      |
| 01                              | 217                                | 152  | 1.43 | 0.04605                              | 0.00449 | 0.12695 | 0.01154                             | 0.02    | 0.0007  | 0.00658                              | 0.00023 | 372±204     | 121±10                               | 128±4   | 133±5                               |                                     |                                      |
| 02                              | 82.9                               | 64.5 | 1.29 | 0.04352                              | 0.00363 | 0.12024 | 0.00941                             | 0.01987 | 0.00071 | 0.00624                              | 0.00032 | -96±151     | 115±9                                | 127±5   | 126±6                               |                                     |                                      |
| 03                              | 181                                | 206  | 0.87 | 0.04652                              | 0.00228 | 0.12832 | 0.00592                             | 0.02011 | 0.00065 | 0.00618                              | 0.00027 | 24±69       | 123±5                                | 128±4   | 124±5                               |                                     |                                      |
| 04                              | 137                                | 142  | 0.97 | 0.04918                              | 0.00290 | 0.13473 | 0.00731                             | 0.01999 | 0.00067 | 0.00631                              | 0.00028 | 156±100     | 128±7                                | 128±4   | 127±6                               |                                     |                                      |
| 05                              | 145                                | 215  | 0.68 | 0.04893                              | 0.00232 | 0.13662 | 0.0064                              | 0.02027 | 0.00066 | 0.00642                              | 0.00029 | 144±79      | 130±6                                | 129±4   | 129±6                               |                                     |                                      |
| 06                              | 418                                | 400  | 1.05 | 0.04808                              | 0.00201 | 0.13821 | 0.006                               | 0.02071 | 0.00069 | 0.00686                              | 0.00029 | 103±65      | 131±5                                | 132±4   | 138±6                               |                                     |                                      |
| 07                              | 292                                | 242  | 1.21 | 0.06346                              | 0.00201 | 1.06382 | 0.0345                              | 0.11966 | 0.00363 | 0.03783                              | 0.00115 | 724±25      | 736±17                               | 729±21  | 751±22                              |                                     |                                      |
| 08                              | 306                                | 280  | 1.09 | 0.05137                              | 0.00245 | 0.14677 | 0.00706                             | 0.02060 | 0.00067 | 0.00678                              | 0.00024 | 258±84      | 139±6                                | 131±4   | 137±5                               |                                     |                                      |
| 09                              | 35.2                               | 45.8 | 0.77 | 0.06466                              | 0.00302 | 1.00899 | 0.04099                             | 0.11444 | 0.00374 | 0.0378                               | 0.00172 | 763±52      | 708±21                               | 698±22  | 750±34                              |                                     |                                      |
| 10                              | 172                                | 272  | 0.63 | 0.04571                              | 0.00198 | 0.12865 | 0.00554                             | 0.02014 | 0.00063 | 0.00655                              | 0.00026 | -17±60      | 123±5                                | 129±4   | 132±5                               |                                     |                                      |
| 11                              | 653                                | 335  | 1.95 | 0.05263                              | 0.00256 | 0.14233 | 0.0069                              | 0.01938 | 0.00062 | 0.0065                               | 0.00025 | 313±85      | 135±6                                | 124±4   | 131±5                               |                                     |                                      |
| 12                              | 122                                | 145  | 0.84 | 0.04847                              | 0.00271 | 0.13645 | 0.0076                              | 0.02025 | 0.00068 | 0.00653                              | 0.0003  | 123±101     | 130±7                                | 129±4   | 132±6                               |                                     |                                      |
| 13                              | 127                                | 120  | 1.06 | 0.04475                              | 0.00269 | 0.12275 | 0.00729                             | 0.01982 | 0.00067 | 0.00649                              | 0.00031 | -32±104     | 118±7                                | 127±4   | 131±6                               |                                     |                                      |
| 14                              | 126                                | 152  | 0.83 | 0.05039                              | 0.00277 | 0.13826 | 0.00738                             | 0.0199  | 0.00067 | 0.00671                              | 0.00031 | 213±98      | 131±7                                | 127±4   | 135±6                               |                                     |                                      |
| 15                              | 126                                | 170  | 0.74 | 0.08391                              | 0.00257 | 2.68213 | 0.08575                             | 0.22732 | 0.00713 | 0.06985                              | 0.0023  | 1291±12     | 1324±24                              | 1320±37 | 1365±43                             |                                     |                                      |
| 16                              | 366                                | 351  | 1.04 | 0.04851                              | 0.00212 | 0.13527 | 0.00586                             | 0.01999 | 0.00064 | 0.00682                              | 0.00025 | 124±69      | 129±5                                | 128±4   | 137±5                               |                                     |                                      |
| 17                              | 331                                | 173  | 1.91 | 0.04866                              | 0.00270 | 0.12634 | 0.00622                             | 0.01903 | 0.00063 | 0.00632                              | 0.00023 | 131±85      | 121±6                                | 122±4   | 127±5                               |                                     |                                      |
| 18                              | 474                                | 604  | 0.79 | 0.05123                              | 0.00236 | 0.14618 | 0.00784                             | 0.02026 | 0.00081 | 0.0069                               | 0.00031 | 251±84      | 139±7                                | 129±5   | 139±6                               |                                     |                                      |
| 19                              | 99.9                               | 130  | 0.77 | 0.06212                              | 0.00219 | 1.0604  | 0.03838                             | 0.1221  | 0.0039  | 0.04032                              | 0.00139 | 678±37      | 734±19                               | 743±22  | 799±27                              |                                     |                                      |
| 20                              | 158                                | 219  | 0.72 | 0.05124                              | 0.00297 | 0.16566 | 0.00892                             | 0.0235  | 0.00085 | 0.00795                              | 0.00045 | 252±94      | 156±8                                | 150±5   | 160±9                               |                                     |                                      |
| 21                              | 44.4                               | 37.0 | 1.20 | 0.06474                              | 0.00299 | 1.07079 | 0.05049                             | 0.11855 | 0.00386 | 0.04042                              | 0.00154 | 766±74      | 739±25                               | 722±22  | 801±30                              |                                     |                                      |
| 22                              | 90.3                               | 112  | 0.80 | 0.04623                              | 0.00273 | 0.13126 | 0.00805                             | 0.02026 | 0.00067 | 0.00625                              | 0.0003  | 10±112      | 125±7                                | 129±4   | 126±6                               |                                     |                                      |
| 23                              | 143                                | 158  | 0.90 | 0.04791                              | 0.00267 | 0.12832 | 0.00717                             | 0.01934 | 0.00063 | 0.00628                              | 0.00027 | 95±102      | 123±6                                | 123±4   | 126±5                               |                                     |                                      |
| 24                              | 298                                | 269  | 1.11 | 0.04802                              | 0.00217 | 0.1308  | 0.00596                             | 0.01947 | 0.00062 | 0.00637                              | 0.00024 | 100±75      | 125±5                                | 124±4   | 128±5                               |                                     |                                      |
| 25                              | 115                                | 149  | 0.77 | 0.04988                              | 0.00298 | 0.13781 | 0.0076                              | 0.02015 | 0.00069 | 0.00681                              | 0.00032 | 189±101     | 131±7                                | 129±4   | 137±6                               |                                     |                                      |
| 26                              | 153                                | 114  | 1.34 | 0.05                                 | 0.00328 | 0.13372 | 0.00743                             | 0.02012 | 0.00074 | 0.00694                              | 0.00032 | 195±99      | 127±7                                | 128±5   | 140±7                               |                                     |                                      |
| 27                              | 214                                | 297  | 0.72 | 0.05033                              | 0.00214 | 0.13965 | 0.00621                             | 0.01981 | 0.00066 | 0.00709                              | 0.00029 | 210±70      | 133±6                                | 126±4   | 143±6                               |                                     |                                      |
| 28                              | 309                                | 179  | 1.73 | 0.06274                              | 0.00211 | 1.06681 | 0.03648                             | 0.12177 | 0.00393 | 0.04016                              | 0.00129 | 699±25      | 737±18                               | 741±23  | 796±25                              |                                     |                                      |
| 29                              | 120                                | 217  | 0.55 | 0.05096                              | 0.00251 | 0.14331 | 0.0072                              | 0.02014 | 0.00072 | 0.00688                              | 0.00033 | 239±83      | 136±6                                | 129±5   | 138±7                               |                                     |                                      |
| 30                              | 153                                | 197  | 0.78 | 0.04605                              | 0.00632 | 0.13055 | 0.01713                             | 0.02056 | 0.00083 | 0.00683                              | 0.00049 | 1505±253    | 125±15                               | 131±5   | 138±10                              |                                     |                                      |
| 31                              | 127                                | 164  | 0.77 | 0.12098                              | 0.00404 | 4.94019 | 0.18351                             | 0.29014 | 0.01059 | 0.08531                              | 0.00308 | 1971±12     | 1809±31                              | 1642±53 | 1655±57                             |                                     |                                      |
| 32                              | 251                                | 187  | 1.34 | 0.04882                              | 0.00357 | 0.12324 | 0.00966                             | 0.01825 | 0.00095 | 0.00632                              | 0.00034 | 139±133     | 118±9                                | 117±6   | 127±7                               |                                     |                                      |
| 33                              | 192                                | 199  | 0.97 | 0.04822                              | 0.00286 | 0.13549 | 0.00792                             | 0.02036 | 0.00072 | 0.00697                              | 0.00032 | 110±105     | 129±7                                | 130±5   | 140±6                               |                                     |                                      |
| 34                              | 106                                | 130  | 0.82 | 0.05486                              | 0.00344 | 0.14785 | 0.00836                             | 0.02015 | 0.00074 | 0.00658                              | 0.00031 | 407±99      | 140±7                                | 129±5   | 133±6                               |                                     |                                      |
| 35                              | 165                                | 186  | 0.89 | 0.05184                              | 0.00271 | 0.14254 | 0.00772                             | 0.01981 | 0.00068 | 0.00634                              | 0.0003  | 279±98      | 135±7                                | 126±4   | 128±6                               |                                     |                                      |
| 36                              | 144                                | 178  | 0.80 | 0.05064                              | 0.0028  | 0.13498 | 0.00699                             | 0.01953 | 0.0007  | 0.00653                              | 0.0003  | 225±89      | 129±6                                | 125±4   | 132±6                               |                                     |                                      |
| 37                              | 380                                | 436  | 0.87 | 0.06443                              | 0.00207 | 1.09507 | 0.03753                             | 0.12201 | 0.0043  | 0.03972                              | 0.00126 | 756±106     | 751±18                               | 742±25  | 787±24                              |                                     |                                      |
| 38                              | 294                                | 268  | 1.10 | 0.04588                              | 0.00212 | 0.12718 | 0.0058                              | 0.02013 | 0.00072 | 0.00707                              | 0.00029 | -8±57       | 122±5                                | 129±5   | 142±6                               |                                     |                                      |
| 39                              | 141                                | 152  | 0.93 | 0.05451                              | 0.0029  | 0.19331 | 0.0105                              | 0.02553 | 0.00097 | 0.00729                              | 0.00033 | 392±89      | 179±9                                | 163±6   | 147±7                               |                                     |                                      |
| 40                              | 135                                | 172  | 0.78 | 0.04458                              | 0.0024  | 0.1219  | 0.00635                             | 0.01963 | 0.00069 | 0.00684                              | 0.0003  | -41±80      | 117±6                                | 125±4   | 138±6                               |                                     |                                      |

|    |      |      |      |         |         |          |         |         |         |         |         |          |         |         |         |
|----|------|------|------|---------|---------|----------|---------|---------|---------|---------|---------|----------|---------|---------|---------|
| 41 | 132  | 149  | 0.89 | 0.04743 | 0.00300 | 0.13143  | 0.00803 | 0.01992 | 0.00075 | 0.00690 | 0.00031 | 71±106   | 125±7   | 127±5   | 139±6   |
| 42 | 166  | 193  | 0.86 | 0.05306 | 0.00301 | 0.15044  | 0.00825 | 0.02047 | 0.00076 | 0.00682 | 0.00031 | 331±93   | 142±7   | 131±5   | 137±6   |
| 43 | 126  | 119  | 1.06 | 0.04881 | 0.00377 | 0.13405  | 0.00965 | 0.02022 | 0.00075 | 0.00667 | 0.00033 | 139±140  | 128±9   | 129±5   | 134±7   |
| 44 | 971  | 295  | 3.29 | 0.05414 | 0.00378 | 0.14899  | 0.00971 | 0.02022 | 0.00080 | 0.00680 | 0.00026 | 377±120  | 141±9   | 129±5   | 137±5   |
| 45 | 8.80 | 169  | 0.05 | 0.04847 | 0.00237 | 0.2368   | 0.01224 | 0.03459 | 0.00128 | 0.01341 | 0.00125 | 122±83   | 216±10  | 219±8   | 269±25  |
| 46 | 70.3 | 37.8 | 1.86 | 0.07367 | 0.00533 | 1.26239  | 0.08215 | 0.12534 | 0.00512 | 0.0413  | 0.00195 | 1033±105 | 829±37  | 761±29  | 818±38  |
| 47 | 280  | 255  | 1.10 | 0.04605 | 0.00375 | 0.12673  | 0.00912 | 0.01996 | 0.00077 | 0.00667 | 0.00025 | 319±179  | 121±8   | 127±5   | 134±5   |
| 48 | 130  | 143  | 0.91 | 0.04824 | 0.00288 | 0.12857  | 0.00695 | 0.01932 | 0.0007  | 0.00626 | 0.00031 | 111±91   | 123±6   | 123±4   | 126±6   |
| 49 | 86.2 | 167  | 0.52 | 0.06175 | 0.00234 | 0.66553  | 0.02908 | 0.07705 | 0.00311 | 0.03356 | 0.0013  | 666±36   | 518±18  | 478±19  | 667±25  |
| 50 | 323  | 282  | 1.15 | 0.05276 | 0.00297 | 0.15216  | 0.00862 | 0.02081 | 0.00081 | 0.00663 | 0.00026 | 319±96   | 144±8   | 133±5   | 134±5   |
| 51 | 109  | 94.8 | 1.15 | 0.06721 | 0.00268 | 1.23098  | 0.04967 | 0.13262 | 0.00487 | 0.04320 | 0.00138 | 844±36   | 815±23  | 803±28  | 855±27  |
| 52 | 45.9 | 55.2 | 0.83 | 0.06971 | 0.00279 | 1.14020  | 0.04754 | 0.11955 | 0.00468 | 0.04119 | 0.00163 | 920±30   | 773±23  | 728±27  | 816±32  |
| 53 | 121  | 157  | 0.77 | 0.05075 | 0.00310 | 0.13312  | 0.00800 | 0.01930 | 0.00077 | 0.00644 | 0.00033 | 229±106  | 127±7   | 123±5   | 130±7   |
| 54 | 129  | 103  | 1.25 | 0.06711 | 0.00246 | 1.12484  | 0.04593 | 0.12035 | 0.00439 | 0.03956 | 0.00133 | 841±39   | 765±22  | 733±25  | 784±26  |
| 55 | 3.85 | 262  | 0.01 | 0.05233 | 0.00212 | 0.26194  | 0.01115 | 0.03626 | 0.00136 | 0.00911 | 0.00211 | 300±46   | 236±9   | 230±8   | 183±42  |
| 56 | 139  | 159  | 0.87 | 0.05077 | 0.00302 | 0.14060  | 0.00801 | 0.02043 | 0.00080 | 0.00649 | 0.00029 | 230±98   | 134±7   | 130±5   | 131±6   |
| 57 | 115  | 72.8 | 1.58 | 0.05245 | 0.00548 | 0.12817  | 0.01046 | 0.01897 | 0.00092 | 0.00651 | 0.00040 | 305±152  | 122±9   | 121±6   | 131±8   |
| 58 | 73.8 | 96.2 | 0.77 | 0.05848 | 0.00499 | 0.14585  | 0.01106 | 0.01959 | 0.00097 | 0.00754 | 0.00045 | 548±129  | 138±10  | 125±6   | 152±9   |
| 59 | 148  | 241  | 0.61 | 0.05126 | 0.00287 | 0.14008  | 0.00745 | 0.02035 | 0.00083 | 0.00677 | 0.0003  | 252±80   | 133±7   | 130±5   | 136±6   |
| 60 | 141  | 89.5 | 1.58 | 0.06515 | 0.00252 | 1.18309  | 0.04639 | 0.13272 | 0.00505 | 0.04203 | 0.00143 | 779±20   | 793±22  | 803±29  | 832±28  |
| 61 | 82.5 | 113  | 0.73 | 0.05106 | 0.00336 | 0.14485  | 0.00898 | 0.02096 | 0.00087 | 0.00655 | 0.00033 | 244±109  | 137±8   | 134±5   | 132±7   |
| 62 | 265  | 178  | 1.49 | 0.05223 | 0.00288 | 0.13992  | 0.00827 | 0.01945 | 0.00075 | 0.00669 | 0.00026 | 296±104  | 133±7   | 124±5   | 135±5   |
| 63 | 264  | 268  | 0.98 | 0.05142 | 0.00259 | 0.14876  | 0.00730 | 0.02110 | 0.00079 | 0.00740 | 0.00029 | 260±74   | 141±6   | 135±5   | 149±6   |
| 64 | 80.3 | 89.6 | 0.90 | 0.06462 | 0.00264 | 1.13742  | 0.04576 | 0.12837 | 0.00465 | 0.04161 | 0.00154 | 762±38   | 771±22  | 779±27  | 824±30  |
| 65 | 111  | 187  | 0.60 | 0.04987 | 0.00252 | 0.13744  | 0.00738 | 0.01989 | 0.00073 | 0.00722 | 0.00034 | 189±93   | 131±7   | 127±5   | 145±7   |
| 66 | 159  | 223  | 0.72 | 0.04601 | 0.0022  | 0.12798  | 0.00652 | 0.0202  | 0.00076 | 0.00713 | 0.0003  | -2±72    | 122±6   | 129±5   | 144±6   |
| 67 | 128  | 104  | 1.23 | 0.04732 | 0.00348 | 0.13167  | 0.00981 | 0.02026 | 0.00083 | 0.00672 | 0.0003  | 66±138   | 126±9   | 129±5   | 135±6   |
| 68 | 43.8 | 54.4 | 0.80 | 0.16895 | 0.00553 | 11.33541 | 0.40364 | 0.48371 | 0.01774 | 0.14174 | 0.00471 | 2547±88  | 2551±33 | 2543±77 | 2679±83 |
| 69 | 556  | 396  | 1.41 | 0.04787 | 0.00211 | 0.13563  | 0.00628 | 0.02039 | 0.00076 | 0.00696 | 0.00024 | 93±63    | 129±6   | 130±5   | 140±5   |
| 70 | 109  | 164  | 0.66 | 0.05075 | 0.00296 | 0.13653  | 0.00819 | 0.0198  | 0.00081 | 0.00682 | 0.00033 | 229±104  | 130±7   | 126±5   | 137±7   |
| 71 | 106  | 83.8 | 1.26 | 0.05413 | 0.00797 | 0.11182  | 0.01545 | 0.01546 | 0.00084 | 0.0062  | 0.00047 | 376±287  | 108±14  | 99±5    | 125±10  |
| 72 | 183  | 220  | 0.83 | 0.04780 | 0.00255 | 0.13375  | 0.00728 | 0.02036 | 0.00077 | 0.00709 | 0.00032 | 89±88    | 127±7   | 130±5   | 143±6   |
| 73 | 204  | 355  | 0.58 | 0.05292 | 0.00266 | 0.14528  | 0.00799 | 0.01954 | 0.00078 | 0.0076  | 0.00039 | 325±87   | 138±7   | 125±5   | 153±8   |
| 74 | 411  | 453  | 0.91 | 0.05049 | 0.00218 | 0.14097  | 0.00595 | 0.02033 | 0.00075 | 0.00703 | 0.00026 | 217±49   | 134±5   | 130±5   | 142±5   |
| 75 | 104  | 130  | 0.80 | 0.05151 | 0.00313 | 0.13951  | 0.0083  | 0.01973 | 0.00075 | 0.00727 | 0.00038 | 264±108  | 133±7   | 126±5   | 146±8   |
| 76 | 174  | 193  | 0.90 | 0.04914 | 0.00276 | 0.13034  | 0.00655 | 0.02014 | 0.00079 | 0.00740 | 0.00032 | 155±75   | 124±6   | 129±5   | 149±6   |
| 77 | 225  | 248  | 0.91 | 0.04713 | 0.00267 | 0.12947  | 0.00759 | 0.01993 | 0.00073 | 0.00710 | 0.00028 | 56±100   | 124±7   | 127±5   | 143±6   |
| 78 | 102  | 114  | 0.89 | 0.05759 | 0.00655 | 0.16086  | 0.01228 | 0.02221 | 0.00125 | 0.00725 | 0.00063 | 514±116  | 151±11  | 142±8   | 146±13  |
| 79 | 113  | 358  | 0.32 | 0.05092 | 0.00221 | 0.20516  | 0.00961 | 0.02903 | 0.00115 | 0.01188 | 0.00068 | 237±59   | 189±8   | 184±7   | 239±14  |
| 80 | 446  | 379  | 1.18 | 0.04731 | 0.00224 | 0.12719  | 0.00621 | 0.01935 | 0.0007  | 0.00643 | 0.00023 | 65±73    | 122±6   | 124±4   | 130±5   |
| 81 | 744  | 665  | 1.12 | 0.05200 | 0.00202 | 0.14317  | 0.00579 | 0.01988 | 0.00071 | 0.00661 | 0.00023 | 285±44   | 136±5   | 127±4   | 133±5   |
| 82 | 113  | 152  | 0.74 | 0.05101 | 0.00334 | 0.13808  | 0.00883 | 0.01989 | 0.00075 | 0.00727 | 0.00033 | 241±121  | 131±8   | 127±5   | 146±7   |
| 83 | 124  | 158  | 0.78 | 0.04605 | 0.00396 | 0.12960  | 0.01006 | 0.02041 | 0.00076 | 0.00672 | 0.00030 | 359±190  | 124±9   | 130±5   | 135±6   |
| 84 | 165  | 149  | 1.10 | 0.05349 | 0.00308 | 0.15016  | 0.00873 | 0.02031 | 0.00075 | 0.00661 | 0.00027 | 350±104  | 142±8   | 130±5   | 133±5   |
| 85 | 105  | 137  | 0.77 | 0.05426 | 0.00355 | 0.15116  | 0.00923 | 0.0204  | 0.00079 | 0.00762 | 0.0004  | 382±109  | 143±8   | 130±5   | 153±8   |

|    |      |      |      |         |         |         |         |         |         |         |         |         |        |        |        |
|----|------|------|------|---------|---------|---------|---------|---------|---------|---------|---------|---------|--------|--------|--------|
| 86 | 130  | 206  | 0.63 | 0.04599 | 0.00245 | 0.12775 | 0.00692 | 0.0199  | 0.00071 | 0.00668 | 0.00034 | -3±86   | 122±6  | 127±4  | 134±7  |
| 87 | 482  | 518  | 0.93 | 0.04889 | 0.00203 | 0.13493 | 0.00577 | 0.01976 | 0.00071 | 0.00683 | 0.00024 | 143±56  | 129±5  | 126±4  | 137±5  |
| 88 | 51.6 | 64.3 | 0.80 | 0.05354 | 0.00529 | 0.14218 | 0.01339 | 0.01937 | 0.00083 | 0.00741 | 0.0005  | 352±193 | 135±12 | 124±5  | 149±10 |
| 89 | 134  | 148  | 0.91 | 0.04477 | 0.00286 | 0.1214  | 0.00725 | 0.02009 | 0.00075 | 0.00706 | 0.00032 | -31±100 | 116±7  | 128±5  | 142±6  |
| 90 | 310  | 365  | 0.85 | 0.04722 | 0.00216 | 0.13258 | 0.00618 | 0.02026 | 0.00074 | 0.00671 | 0.00027 | 61±65   | 126±6  | 129±5  | 135±6  |
| 91 | 94.4 | 93.8 | 1.01 | 0.04638 | 0.00332 | 0.12552 | 0.00817 | 0.02008 | 0.00076 | 0.00726 | 0.00037 | 18±115  | 120±7  | 128±5  | 146±7  |
| 92 | 90.6 | 118  | 0.77 | 0.05116 | 0.00321 | 0.14647 | 0.00981 | 0.02013 | 0.00078 | 0.00736 | 0.00036 | 248±128 | 139±9  | 128±5  | 148±7  |
| 93 | 127  | 209  | 0.61 | 0.05152 | 0.004   | 0.13892 | 0.01173 | 0.01918 | 0.00081 | 0.00743 | 0.00043 | 264±168 | 132±10 | 122±5  | 150±9  |
| 94 | 173  | 197  | 0.88 | 0.0488  | 0.00269 | 0.1284  | 0.00679 | 0.01894 | 0.00066 | 0.0066  | 0.00028 | 138±93  | 123±6  | 121±4  | 133±6  |
| 95 | 133  | 177  | 0.75 | 0.05356 | 0.00308 | 0.1455  | 0.00815 | 0.01961 | 0.00073 | 0.00772 | 0.00038 | 353±97  | 138±7  | 125±5  | 155±8  |
| 96 | 43.6 | 55.8 | 0.78 | 0.06681 | 0.00283 | 1.16983 | 0.05121 | 0.12583 | 0.00431 | 0.0434  | 0.00167 | 832±58  | 787±24 | 764±25 | 859±32 |

|                                 |      |      |      |         |         |          |         |         |         |         |         |         |         |         |         |
|---------------------------------|------|------|------|---------|---------|----------|---------|---------|---------|---------|---------|---------|---------|---------|---------|
| 9122 zircon U-Pb dating results |      |      |      |         |         |          |         |         |         |         |         |         |         |         |         |
| 01                              | 9.68 | 281  | 0.03 | 0.05505 | 0.00244 | 0.25359  | 0.01101 | 0.03279 | 0.00106 | 0.03051 | 0.00286 | 414±46  | 229±9   | 208±7   | 607±56  |
| 02                              | 133  | 179  | 0.74 | 0.0457  | 0.00294 | 0.12067  | 0.00764 | 0.01887 | 0.00066 | 0.00639 | 0.00029 | -18±73  | 116±7   | 120±4   | 129±6   |
| 03                              | 12.7 | 96.5 | 0.13 | 0.05611 | 0.0035  | 0.31839  | 0.02172 | 0.0404  | 0.00168 | 0.02398 | 0.00217 | 457±81  | 281±17  | 255±10  | 479±43  |
| 04                              | 53.8 | 48.7 | 1.11 | 0.12184 | 0.00394 | 5.75728  | 0.19573 | 0.33352 | 0.01095 | 0.10259 | 0.00349 | 1983±27 | 1940±29 | 1855±53 | 1974±64 |
| 05                              | 178  | 232  | 0.77 | 0.04557 | 0.00279 | 0.09244  | 0.00533 | 0.01467 | 0.00051 | 0.00467 | 0.00022 | -25±62  | 90±5    | 94±3    | 94±4    |
| 06                              | 97.6 | 91.7 | 1.06 | 0.06574 | 0.00265 | 1.0488   | 0.04301 | 0.1135  | 0.00385 | 0.03846 | 0.00138 | 798±39  | 728±21  | 693±22  | 763±27  |
| 07                              | 209  | 223  | 0.94 | 0.04605 | 0.00376 | 0.1177   | 0.00866 | 0.01854 | 0.00066 | 0.00617 | 0.00025 | ±179    | 113±8   | 118±4   | 124±5   |
| 08                              | 213  | 196  | 1.09 | 0.05142 | 0.00342 | 0.13636  | 0.0086  | 0.01902 | 0.00068 | 0.00588 | 0.00028 | 260±81  | 130±8   | 121±4   | 118±6   |
| 09                              | 177  | 194  | 0.91 | 0.04739 | 0.00286 | 0.12072  | 0.00719 | 0.01832 | 0.00063 | 0.0064  | 0.00029 | 69±72   | 116±7   | 117±4   | 129±6   |
| 10                              | 82.6 | 105  | 0.79 | 0.05277 | 0.00568 | 0.1397   | 0.01485 | 0.01909 | 0.00087 | 0.007   | 0.00046 | 319±158 | 133±13  | 122±5   | 141±9   |
| 11                              | 68.0 | 70.6 | 0.96 | 0.05536 | 0.0056  | 0.14614  | 0.01198 | 0.01967 | 0.00077 | 0.00734 | 0.00041 | 427±114 | 138±11  | 126±5   | 148±8   |
| 12                              | 87.9 | 115  | 0.76 | 0.05355 | 0.0041  | 0.14396  | 0.01011 | 0.01949 | 0.00071 | 0.00722 | 0.00042 | 352±94  | 137±9   | 124±5   | 145±8   |
| 13                              | 494  | 357  | 1.38 | 0.04806 | 0.00231 | 0.13508  | 0.00634 | 0.02005 | 0.00068 | 0.00758 | 0.00029 | 102±53  | 129±6   | 128±4   | 153±6   |
| 14                              | 149  | 410  | 0.36 | 0.04535 | 0.00256 | 0.08999  | 0.00489 | 0.01411 | 0.00047 | 0.00482 | 0.00024 | -2±57   | 87±5    | 90±3    | 97±5    |
| 15                              | 237  | 333  | 0.71 | 0.048   | 0.00227 | 0.13085  | 0.00618 | 0.01945 | 0.00067 | 0.00676 | 0.00028 | 99±53   | 125±6   | 124±4   | 136±6   |
| 16                              | 362  | 203  | 1.78 | 0.0456  | 0.0025  | 0.12495  | 0.00685 | 0.01919 | 0.00068 | 0.00647 | 0.00025 | -23±56  | 120±6   | 123±4   | 130±5   |
| 17                              | 147  | 186  | 0.79 | 0.05368 | 0.00361 | 0.13245  | 0.00856 | 0.01789 | 0.0008  | 0.00722 | 0.00038 | 358±72  | 126±8   | 114±5   | 145±8   |
| 18                              | 160  | 165  | 0.97 | 0.06357 | 0.00224 | 1.06015  | 0.03815 | 0.11742 | 0.00398 | 0.03898 | 0.00128 | 727±34  | 734±19  | 716±23  | 773±25  |
| 19                              | 149  | 266  | 0.56 | 0.05195 | 0.00289 | 0.13683  | 0.00758 | 0.01853 | 0.00068 | 0.00717 | 0.00031 | 283±64  | 130±7   | 118±4   | 144±6   |
| 20                              | 81.0 | 100  | 0.81 | 0.04856 | 0.00379 | 0.12808  | 0.00909 | 0.01874 | 0.00075 | 0.00645 | 0.00041 | 127±91  | 122±8   | 120±5   | 130±8   |
| 21                              | 140  | 142  | 0.98 | 0.04956 | 0.00352 | 0.13363  | 0.00897 | 0.01903 | 0.00073 | 0.00633 | 0.00032 | 174±87  | 127±8   | 122±5   | 127±6   |
| 22                              | 309  | 250  | 1.24 | 0.04605 | 0.00397 | 0.11752  | 0.00918 | 0.01851 | 0.00068 | 0.00618 | 0.00024 | 247±190 | 113±8   | 118±4   | 125±5   |
| 23                              | 100  | 139  | 0.72 | 0.12008 | 0.00391 | 5.45208  | 0.19166 | 0.31772 | 0.01155 | 0.09829 | 0.00328 | 1957±29 | 1893±30 | 1779±56 | 1895±60 |
| 24                              | 196  | 134  | 1.46 | 0.06434 | 0.00253 | 1.08582  | 0.04405 | 0.12034 | 0.00472 | 0.04011 | 0.00134 | 753±39  | 746±21  | 733±27  | 795±26  |
| 25                              | 227  | 220  | 1.03 | 0.05114 | 0.00299 | 0.13539  | 0.00758 | 0.0191  | 0.00076 | 0.00710 | 0.00030 | 247±63  | 129±7   | 122±5   | 143±6   |
| 26                              | 111  | 151  | 0.73 | 0.05171 | 0.00355 | 0.13774  | 0.00975 | 0.01877 | 0.00069 | 0.00700 | 0.00040 | 273±96  | 131±9   | 120±4   | 141±8   |
| 27                              | 218  | 301  | 0.73 | 0.04669 | 0.00257 | 0.12676  | 0.00686 | 0.01924 | 0.00071 | 0.00666 | 0.00029 | 33±57   | 121±6   | 123±4   | 134±6   |
| 28                              | 135  | 183  | 0.74 | 0.04605 | 0.00436 | 0.11797  | 0.01017 | 0.01858 | 0.00072 | 0.00613 | 0.00026 | 287±200 | 113±9   | 119±5   | 123±5   |
| 29                              | 185  | 222  | 0.83 | 0.04605 | 0.00335 | 0.12100  | 0.00754 | 0.01906 | 0.00072 | 0.00644 | 0.00027 | 245±161 | 116±7   | 122±5   | 130±5   |
| 30                              | 7.13 | 48.5 | 0.15 | 0.05438 | 0.00468 | 0.23457  | 0.01968 | 0.0318  | 0.00141 | 0.01186 | 0.00132 | 387±111 | 214±16  | 202±9   | 238±26  |
| 31                              | 151  | 334  | 0.45 | 0.17011 | 0.00565 | 10.27469 | 0.37342 | 0.42898 | 0.0168  | 0.12981 | 0.00411 | 2559±29 | 2460±34 | 2301±76 | 2467±74 |
| 32                              | 97.5 | 130  | 0.75 | 0.05154 | 0.00341 | 0.13549  | 0.00862 | 0.01899 | 0.00079 | 0.00701 | 0.00037 | 265±75  | 129±8   | 121±5   | 141±7   |

|    |      |      |      |         |         |         |         |         |         |         |         |          |         |         |         |
|----|------|------|------|---------|---------|---------|---------|---------|---------|---------|---------|----------|---------|---------|---------|
| 33 | 224  | 355  | 0.63 | 0.04966 | 0.00236 | 0.13132 | 0.00615 | 0.01917 | 0.00077 | 0.00684 | 0.00028 | 179±49   | 125±6   | 122±5   | 138±6   |
| 34 | 106  | 66.7 | 1.58 | 0.06214 | 0.00286 | 0.98174 | 0.04568 | 0.11262 | 0.00434 | 0.03804 | 0.00141 | 679±45   | 694±23  | 688±25  | 755±27  |
| 35 | 163  | 230  | 0.71 | 0.04605 | 0.00416 | 0.11859 | 0.009   | 0.01868 | 0.00091 | 0.00645 | 0.00036 | 823±197  | 114±8   | 119±6   | 130±7   |
| 36 | 47.8 | 54.1 | 0.88 | 0.06538 | 0.00303 | 1.07768 | 0.05094 | 0.11845 | 0.00481 | 0.03892 | 0.00159 | 786±44   | 742±25  | 722±28  | 772±31  |
| 37 | 285  | 259  | 1.10 | 0.05727 | 0.00228 | 0.53778 | 0.02177 | 0.06711 | 0.00263 | 0.02248 | 0.00079 | 502±40   | 437±14  | 419±16  | 449±16  |
| 38 | 181  | 94.5 | 1.91 | 0.05575 | 0.00541 | 0.09872 | 0.00862 | 0.0136  | 0.00064 | 0.00469 | 0.00024 | 442±113  | 96±8    | 87±4    | 95±5    |
| 39 | 106  | 83.0 | 1.28 | 0.06752 | 0.00296 | 1.15043 | 0.04924 | 0.1241  | 0.00521 | 0.04218 | 0.0017  | 854±40   | 777±23  | 754±30  | 835±33  |
| 40 | 237  | 249  | 0.95 | 0.05079 | 0.00295 | 0.13756 | 0.00808 | 0.01944 | 0.00082 | 0.00675 | 0.00029 | 231±66   | 131±7   | 124±5   | 136±6   |
| 41 | 42.1 | 47.7 | 0.88 | 0.13893 | 0.01244 | 7.16965 | 0.5541  | 0.37428 | 0.01694 | 0.10573 | 0.00454 | 2214±161 | 2133±69 | 2050±79 | 2031±83 |
| 42 | 337  | 470  | 0.72 | 0.04971 | 0.00235 | 0.13296 | 0.00666 | 0.01912 | 0.00077 | 0.00658 | 0.00025 | 181±53   | 127±6   | 122±5   | 133±5   |
| 43 | 202  | 304  | 0.66 | 0.04605 | 0.0045  | 0.11816 | 0.01014 | 0.01861 | 0.00087 | 0.00616 | 0.00027 | 364±204  | 113±9   | 119±5   | 124±5   |
| 44 | 175  | 210  | 0.83 | 0.05347 | 0.00308 | 0.13271 | 0.00701 | 0.01849 | 0.00077 | 0.00622 | 0.0003  | 349±55   | 127±6   | 118±5   | 125±6   |
| 45 | 143  | 188  | 0.76 | 0.04605 | 0.00428 | 0.11936 | 0.00931 | 0.0188  | 0.00095 | 0.00651 | 0.00034 | 312±199  | 114±8   | 120±6   | 131±7   |
| 46 | 25.8 | 74.8 | 0.35 | 0.04999 | 0.00366 | 0.2293  | 0.01748 | 0.03313 | 0.00144 | 0.01203 | 0.00091 | 195±98   | 210±14  | 210±9   | 242±18  |
| 47 | 157  | 136  | 1.15 | 0.04914 | 0.00388 | 0.12292 | 0.008   | 0.01907 | 0.00087 | 0.00749 | 0.00038 | 154±75   | 118±7   | 122±5   | 151±8   |
| 48 | 111  | 115  | 0.97 | 0.06412 | 0.00282 | 1.1066  | 0.0511  | 0.12317 | 0.00529 | 0.03968 | 0.00148 | 745±44   | 757±25  | 749±30  | 787±29  |
| 49 | 173  | 311  | 0.56 | 0.12524 | 0.00458 | 5.64808 | 0.21906 | 0.32351 | 0.01392 | 0.10145 | 0.00346 | 2032±34  | 1923±33 | 1807±68 | 1953±64 |
| 50 | 140  | 188  | 0.74 | 0.04594 | 0.00288 | 0.1173  | 0.00657 | 0.01899 | 0.00081 | 0.00628 | 0.00032 | -5±51    | 113±6   | 121±5   | 126±6   |
| 51 | 85.4 | 92.2 | 0.93 | 0.06569 | 0.00269 | 1.09759 | 0.04928 | 0.11867 | 0.00491 | 0.03932 | 0.00145 | 797±42   | 752±24  | 723±28  | 780±28  |
| 52 | 55.4 | 146  | 0.38 | 0.04936 | 0.00483 | 0.23917 | 0.02104 | 0.03515 | 0.0015  | 0.01111 | 0.00043 | 165±222  | 218±17  | 223±9   | 223±9   |
| 53 | 234  | 314  | 0.74 | 0.04725 | 0.00257 | 0.12572 | 0.00656 | 0.01915 | 0.00075 | 0.00656 | 0.00029 | 62±55    | 120±6   | 122±5   | 132±6   |
| 54 | 46.0 | 47.4 | 0.97 | 0.06258 | 0.00339 | 0.94603 | 0.05029 | 0.1099  | 0.00463 | 0.03898 | 0.00168 | 694±52   | 676±26  | 672±27  | 773±33  |
| 55 | 9.47 | 181  | 0.05 | 0.04991 | 0.00382 | 0.22691 | 0.01447 | 0.03297 | 0.00139 | 0.01041 | 0.00052 | 191±174  | 208±12  | 209±9   | 209±10  |
| 56 | 85.9 | 94.4 | 0.91 | 0.04762 | 0.0042  | 0.12151 | 0.01076 | 0.01804 | 0.00086 | 0.00672 | 0.00039 | 81±112   | 116±10  | 115±5   | 135±8   |
| 57 | 236  | 224  | 1.05 | 0.05022 | 0.00303 | 0.13052 | 0.00775 | 0.01853 | 0.00075 | 0.00627 | 0.00029 | 205±69   | 125±7   | 118±5   | 126±6   |
| 58 | 209  | 256  | 0.82 | 0.05052 | 0.00288 | 0.13531 | 0.00752 | 0.01918 | 0.00074 | 0.00707 | 0.00031 | 219±63   | 129±7   | 122±5   | 142±6   |
| 59 | 126  | 170  | 0.74 | 0.04983 | 0.00746 | 0.12354 | 0.01765 | 0.01798 | 0.0008  | 0.00568 | 0.00023 | 187±301  | 118±16  | 115±5   | 114±5   |
| 60 | 166  | 187  | 0.89 | 0.04561 | 0.00345 | 0.11484 | 0.00757 | 0.01823 | 0.00077 | 0.00678 | 0.00031 | -23±69   | 110±7   | 116±5   | 137±6   |
| 61 | 232  | 215  | 1.08 | 0.0449  | 0.00312 | 0.11871 | 0.00694 | 0.01944 | 0.00076 | 0.00644 | 0.00029 | -24±58   | 114±6   | 124±5   | 130±6   |
| 62 | 172  | 224  | 0.77 | 0.04944 | 0.00302 | 0.12553 | 0.00707 | 0.01822 | 0.00074 | 0.00647 | 0.00029 | 169±64   | 120±6   | 116±5   | 130±6   |
| 63 | 135  | 148  | 0.91 | 0.04605 | 0.00385 | 0.11527 | 0.00838 | 0.01816 | 0.00075 | 0.00617 | 0.00028 | 341±184  | 111±8   | 116±5   | 124±6   |
| 64 | 56.0 | 82.1 | 0.68 | 0.04605 | 0.00553 | 0.12026 | 0.01365 | 0.01894 | 0.00074 | 0.0067  | 0.00062 | 1474±238 | 115±12  | 121±5   | 135±12  |
| 65 | 213  | 251  | 0.85 | 0.1212  | 0.0042  | 5.26535 | 0.19087 | 0.30661 | 0.01182 | 0.09533 | 0.00313 | 1974±31  | 1863±31 | 1724±58 | 1840±58 |
| 66 | 100  | 110  | 0.91 | 0.06102 | 0.0025  | 0.99962 | 0.04354 | 0.11516 | 0.00447 | 0.04214 | 0.0016  | 640±42   | 704±22  | 703±26  | 834±31  |
| 67 | 277  | 214  | 1.30 | 0.07011 | 0.00352 | 1.04927 | 0.05207 | 0.10892 | 0.00508 | 0.03808 | 0.00139 | 932±46   | 729±26  | 666±30  | 755±27  |
| 68 | 151  | 258  | 0.59 | 0.05397 | 0.00392 | 0.14628 | 0.00877 | 0.0199  | 0.00077 | 0.00782 | 0.00037 | 370±69   | 139±8   | 127±5   | 157±7   |
| 69 | 87.5 | 144  | 0.61 | 0.05175 | 0.00384 | 0.12999 | 0.008   | 0.01858 | 0.00074 | 0.00566 | 0.00034 | 274±73   | 124±7   | 119±5   | 114±7   |
| 70 | 186  | 204  | 0.91 | 0.05082 | 0.00293 | 0.13296 | 0.00791 | 0.01901 | 0.00082 | 0.00632 | 0.00028 | 233±66   | 127±7   | 121±5   | 127±6   |
| 71 | 208  | 289  | 0.72 | 0.05109 | 0.00256 | 0.14076 | 0.00779 | 0.01958 | 0.00085 | 0.00623 | 0.00027 | 245±59   | 134±7   | 125±5   | 126±5   |
| 72 | 67.6 | 91.0 | 0.74 | 0.05001 | 0.00468 | 0.12934 | 0.01127 | 0.01938 | 0.00086 | 0.00746 | 0.00051 | 195±118  | 124±10  | 124±5   | 150±10  |
| 73 | 55.0 | 40.4 | 1.36 | 0.06254 | 0.00336 | 1.03146 | 0.05446 | 0.11983 | 0.005   | 0.04016 | 0.00176 | 693±52   | 720±27  | 730±29  | 796±34  |
| 74 | 174  | 189  | 0.92 | 0.05004 | 0.00369 | 0.12562 | 0.00754 | 0.01907 | 0.00083 | 0.00675 | 0.00032 | 197±67   | 120±7   | 122±5   | 136±6   |
| 75 | 44.0 | 53.5 | 0.82 | 0.06138 | 0.00328 | 0.97139 | 0.0502  | 0.11627 | 0.00499 | 0.03948 | 0.00166 | 653±50   | 689±26  | 709±29  | 783±32  |
| 76 | 401  | 312  | 1.29 | 0.04975 | 0.0028  | 0.13107 | 0.00699 | 0.01918 | 0.00079 | 0.00664 | 0.00027 | 183±58   | 125±6   | 122±5   | 134±5   |
| 77 | 172  | 196  | 0.88 | 0.04615 | 0.00274 | 0.1236  | 0.00773 | 0.01898 | 0.00085 | 0.00663 | 0.00031 | 5±61     | 118±7   | 121±5   | 133±6   |

|    |      |      |      |         |         |         |         |         |         |         |         |         |         |         |         |
|----|------|------|------|---------|---------|---------|---------|---------|---------|---------|---------|---------|---------|---------|---------|
| 78 | 88.3 | 271  | 0.33 | 0.04466 | 0.00301 | 0.09097 | 0.0062  | 0.01473 | 0.00069 | 0.00442 | 0.00029 | -37±68  | 88±6    | 94±4    | 89±6    |
| 79 | 232  | 251  | 0.92 | 0.0472  | 0.00285 | 0.12622 | 0.00755 | 0.01987 | 0.00094 | 0.00648 | 0.0003  | 59±60   | 121±7   | 127±6   | 131±6   |
| 80 | 65.7 | 60.5 | 1.09 | 0.04605 | 0.00374 | 0.12789 | 0.00824 | 0.02014 | 0.00099 | 0.00742 | 0.0005  | 573±178 | 122±7   | 129±6   | 149±10  |
| 81 | 118  | 151  | 0.78 | 0.05323 | 0.0117  | 0.14181 | 0.03017 | 0.01932 | 0.00106 | 0.00605 | 0.00031 | 339±416 | 135±27  | 123±7   | 122±6   |
| 82 | 350  | 524  | 0.67 | 0.11989 | 0.00391 | 5.76958 | 0.2112  | 0.3429  | 0.01397 | 0.10739 | 0.00343 | 1955±32 | 1942±32 | 1901±67 | 2062±63 |
| 83 | 94.6 | 120  | 0.79 | 0.04938 | 0.00393 | 0.12742 | 0.00986 | 0.01931 | 0.00087 | 0.00681 | 0.00039 | 166±97  | 122±9   | 123±6   | 137±8   |
| 84 | 366  | 253  | 1.45 | 0.04942 | 0.00272 | 0.13202 | 0.0075  | 0.01903 | 0.00077 | 0.00648 | 0.00027 | 168±64  | 126±7   | 121±5   | 131±5   |
| 85 | 103  | 286  | 0.36 | 0.04605 | 0.0033  | 0.09097 | 0.00536 | 0.01433 | 0.00058 | 0.00484 | 0.00025 | 266±158 | 88±5    | 92±4    | 98±5    |
| 86 | 93.6 | 228  | 0.41 | 0.05143 | 0.00317 | 0.10294 | 0.00613 | 0.0145  | 0.00059 | 0.00491 | 0.0003  | 260±68  | 99±6    | 93±4    | 99±6    |
| 87 | 68.2 | 82.5 | 0.83 | 0.12111 | 0.0041  | 5.75673 | 0.21537 | 0.33703 | 0.01336 | 0.10206 | 0.00353 | 1973±32 | 1940±32 | 1872±64 | 1964±65 |
| 88 | 123  | 162  | 0.76 | 0.05145 | 0.00357 | 0.13816 | 0.00991 | 0.01895 | 0.00079 | 0.00668 | 0.00035 | 261±91  | 131±9   | 121±5   | 135±7   |
| 89 | 75.6 | 79.3 | 0.95 | 0.05386 | 0.00797 | 0.13405 | 0.01583 | 0.01832 | 0.00104 | 0.00715 | 0.0006  | 365±165 | 128±14  | 117±7   | 144±12  |
| 90 | 277  | 343  | 0.81 | 0.04581 | 0.00229 | 0.12397 | 0.00632 | 0.01932 | 0.0008  | 0.00637 | 0.00025 | -12±45  | 119±6   | 123±5   | 128±5   |
| 91 | 154  | 123  | 1.25 | 0.06762 | 0.0027  | 1.12989 | 0.04655 | 0.11939 | 0.00486 | 0.03871 | 0.00142 | 857±39  | 768±22  | 727±28  | 768±28  |
| 92 | 100  | 139  | 0.72 | 0.04884 | 0.00367 | 0.12717 | 0.00873 | 0.01933 | 0.00082 | 0.00965 | 0.00329 | 140±84  | 122±8   | 123±5   | 194±66  |
| 93 | 128  | 130  | 0.98 | 0.04605 | 0.00451 | 0.12018 | 0.01064 | 0.01893 | 0.00079 | 0.00634 | 0.00029 | 382±205 | 115±10  | 121±5   | 128±6   |
| 94 | 87.6 | 206  | 0.43 | 0.04605 | 0.00535 | 0.1242  | 0.01312 | 0.01956 | 0.00094 | 0.00646 | 0.00048 | 963±230 | 119±12  | 125±6   | 130±10  |
| 95 | 163  | 354  | 0.46 | 0.04906 | 0.00252 | 0.10217 | 0.00566 | 0.01457 | 0.0006  | 0.005   | 0.00028 | 151±62  | 99±5    | 93±4    | 101±6   |
| 96 | 457  | 1127 | 0.41 | 0.04715 | 0.00193 | 0.09596 | 0.00402 | 0.01434 | 0.00056 | 0.00488 | 0.0002  | 57±43   | 93±4    | 92±4    | 98±4    |

9123 zircon U-Pb dating results

|    |      |      |      |         |         |         |         |         |         |         |         |         |        |        |        |
|----|------|------|------|---------|---------|---------|---------|---------|---------|---------|---------|---------|--------|--------|--------|
| 01 | 227  | 201  | 1.13 | 0.04707 | 0.00237 | 0.12864 | 0.00621 | 0.01977 | 0.00061 | 0.0065  | 0.00025 | 53±55   | 123±6  | 126±4  | 131±5  |
| 02 | 156  | 164  | 0.95 | 0.04995 | 0.00268 | 0.13089 | 0.00671 | 0.01912 | 0.00062 | 0.0065  | 0.00028 | 192±62  | 125±6  | 122±4  | 131±6  |
| 03 | 82.0 | 112  | 0.73 | 0.06563 | 0.00223 | 1.06321 | 0.03772 | 0.11579 | 0.00359 | 0.04009 | 0.00144 | 794±33  | 735±19 | 706±21 | 794±28 |
| 04 | 227  | 201  | 1.13 | 0.06635 | 0.00215 | 1.07779 | 0.03609 | 0.1158  | 0.00349 | 0.03696 | 0.00117 | 818±31  | 743±18 | 706±20 | 733±23 |
| 05 | 155  | 164  | 0.95 | 0.05379 | 0.00271 | 0.14418 | 0.00702 | 0.01944 | 0.00064 | 0.00633 | 0.00028 | 362±55  | 137±6  | 124±4  | 127±6  |
| 06 | 106  | 132  | 0.80 | 0.04917 | 0.00315 | 0.13781 | 0.00814 | 0.02074 | 0.00073 | 0.00679 | 0.00032 | 156±75  | 131±7  | 132±5  | 137±7  |
| 07 | 577  | 484  | 1.19 | 0.06548 | 0.00198 | 1.09442 | 0.03433 | 0.11926 | 0.00362 | 0.03887 | 0.00118 | 790±30  | 751±17 | 726±21 | 771±23 |
| 08 | 36.1 | 32.4 | 1.11 | 0.06811 | 0.00364 | 1.12128 | 0.06256 | 0.11907 | 0.004   | 0.04119 | 0.00162 | 872±62  | 764±30 | 725±23 | 816±32 |
| 09 | 116  | 122  | 0.95 | 0.06406 | 0.0022  | 1.05549 | 0.03787 | 0.11771 | 0.00364 | 0.03765 | 0.00123 | 744±34  | 732±19 | 717±21 | 747±24 |
| 10 | 392  | 151  | 2.60 | 0.06385 | 0.00212 | 1.03168 | 0.03555 | 0.11509 | 0.00345 | 0.03592 | 0.00113 | 737±33  | 720±18 | 702±20 | 713±22 |
| 11 | 133  | 77.7 | 1.71 | 0.05229 | 0.00372 | 0.13528 | 0.0083  | 0.01923 | 0.00066 | 0.00687 | 0.00029 | 298±80  | 129±7  | 123±4  | 138±6  |
| 12 | 71.6 | 88.8 | 0.81 | 0.06642 | 0.00247 | 1.10795 | 0.04418 | 0.11854 | 0.00368 | 0.03981 | 0.00135 | 820±39  | 757±21 | 722±21 | 789±26 |
| 13 | 103  | 117  | 0.88 | 0.05035 | 0.00351 | 0.13043 | 0.00786 | 0.01932 | 0.00072 | 0.00707 | 0.00042 | 211±74  | 124±7  | 123±5  | 142±9  |
| 14 | 204  | 232  | 0.88 | 0.04736 | 0.00225 | 0.12976 | 0.00613 | 0.01973 | 0.00062 | 0.00675 | 0.00026 | 67±54   | 124±6  | 126±4  | 136±5  |
| 15 | 137  | 198  | 0.69 | 0.04605 | 0.00392 | 0.12412 | 0.00979 | 0.01955 | 0.00063 | 0.00634 | 0.00023 | 242±188 | 119±9  | 125±4  | 128±5  |
| 16 | 273  | 263  | 1.04 | 0.06442 | 0.002   | 1.09112 | 0.0366  | 0.12027 | 0.00378 | 0.04018 | 0.00123 | 755±32  | 749±18 | 732±22 | 796±24 |
| 17 | 192  | 268  | 0.71 | 0.05218 | 0.00293 | 0.14916 | 0.00832 | 0.02055 | 0.00067 | 0.00698 | 0.00034 | 293±70  | 141±7  | 131±4  | 141±7  |
| 18 | 219  | 215  | 1.02 | 0.04532 | 0.0024  | 0.12163 | 0.00658 | 0.01925 | 0.00064 | 0.00671 | 0.00028 | -4±57   | 117±6  | 123±4  | 135±6  |
| 19 | 1307 | 691  | 1.89 | 0.04729 | 0.00179 | 0.12895 | 0.00506 | 0.01944 | 0.00063 | 0.00663 | 0.00021 | 64±42   | 123±5  | 124±4  | 134±4  |
| 20 | 249  | 276  | 0.90 | 0.04605 | 0.00422 | 0.12045 | 0.01026 | 0.01897 | 0.00064 | 0.00615 | 0.0002  | 282±198 | 115±9  | 121±4  | 124±4  |
| 21 | 555  | 298  | 1.86 | 0.05318 | 0.00236 | 0.14095 | 0.00629 | 0.01901 | 0.00062 | 0.0061  | 0.00022 | 336±48  | 134±6  | 121±4  | 123±4  |
| 22 | 489  | 304  | 1.61 | 0.04605 | 0.00318 | 0.12414 | 0.00747 | 0.01955 | 0.00066 | 0.00663 | 0.00024 | 250±152 | 119±7  | 125±4  | 134±5  |
| 23 | 32.1 | 23.2 | 1.39 | 0.06538 | 0.00335 | 1.0917  | 0.05234 | 0.12183 | 0.00434 | 0.03847 | 0.00154 | 787±48  | 749±25 | 741±25 | 763±30 |
| 24 | 198  | 275  | 0.72 | 0.05289 | 0.00312 | 0.1368  | 0.00813 | 0.01863 | 0.00067 | 0.00631 | 0.00033 | 324±73  | 130±7  | 119±4  | 127±7  |
| 25 | 184  | 209  | 0.88 | 0.04978 | 0.00251 | 0.1316  | 0.00653 | 0.01904 | 0.00061 | 0.00664 | 0.00027 | 185±60  | 126±6  | 122±4  | 134±6  |

|    |       |      |      |         |         |          |         |         |         |         |         |         |         |         |         |
|----|-------|------|------|---------|---------|----------|---------|---------|---------|---------|---------|---------|---------|---------|---------|
| 26 | 106   | 143  | 0.74 | 0.05425 | 0.00326 | 0.14571  | 0.00862 | 0.01961 | 0.00066 | 0.00741 | 0.00039 | 382±75  | 138±8   | 125±4   | 149±8   |
| 27 | 89.1  | 372  | 0.24 | 0.12177 | 0.0035  | 5.01408  | 0.15444 | 0.29207 | 0.00905 | 0.08933 | 0.00278 | 1982±25 | 1822±26 | 1652±45 | 1729±52 |
| 28 | 54.4  | 78.5 | 0.69 | 0.05147 | 0.00402 | 0.13839  | 0.01024 | 0.01951 | 0.00069 | 0.00688 | 0.00036 | 262±106 | 132±9   | 125±4   | 139±7   |
| 29 | 57.0  | 58.0 | 0.98 | 0.05329 | 0.00423 | 0.13131  | 0.00942 | 0.0184  | 0.00067 | 0.00648 | 0.00036 | 341±98  | 125±8   | 118±4   | 131±7   |
| 30 | 42.3  | 58.1 | 0.73 | 0.06496 | 0.00252 | 1.06891  | 0.042   | 0.11779 | 0.00373 | 0.03787 | 0.00147 | 773±38  | 738±21  | 718±22  | 751±29  |
| 31 | 54.8  | 38.3 | 1.43 | 0.06795 | 0.00303 | 1.07143  | 0.0477  | 0.11349 | 0.00374 | 0.04    | 0.00148 | 867±44  | 739±23  | 693±22  | 793±29  |
| 32 | 166   | 80.7 | 2.06 | 0.06686 | 0.00253 | 1.07658  | 0.04124 | 0.11518 | 0.00371 | 0.03693 | 0.0012  | 833±36  | 742±20  | 703±21  | 733±23  |
| 33 | 263   | 249  | 1.05 | 0.0657  | 0.00207 | 1.15763  | 0.03921 | 0.12476 | 0.00392 | 0.04043 | 0.00128 | 797±32  | 781±18  | 758±22  | 801±25  |
| 34 | 171   | 294  | 0.58 | 0.05022 | 0.00214 | 0.14245  | 0.00611 | 0.02029 | 0.00066 | 0.00715 | 0.0003  | 205±47  | 135±5   | 129±4   | 144±6   |
| 35 | 100.0 | 103  | 0.97 | 0.05588 | 0.00454 | 0.15446  | 0.01023 | 0.0207  | 0.00083 | 0.00698 | 0.00041 | 448±79  | 146±9   | 132±5   | 140±8   |
| 36 | 137   | 152  | 0.90 | 0.06734 | 0.00227 | 1.15946  | 0.04032 | 0.12239 | 0.00382 | 0.04355 | 0.00146 | 848±32  | 782±19  | 744±22  | 862±28  |
| 37 | 90.3  | 77.7 | 1.16 | 0.04594 | 0.00353 | 0.11955  | 0.00846 | 0.01908 | 0.00069 | 0.00666 | 0.00033 | -5±88   | 115±8   | 122±4   | 134±7   |
| 38 | 86.1  | 126  | 0.68 | 0.04977 | 0.00308 | 0.13422  | 0.00792 | 0.01953 | 0.00066 | 0.00673 | 0.00035 | 184±77  | 128±7   | 125±4   | 136±7   |
| 39 | 186   | 196  | 0.95 | 0.04946 | 0.00259 | 0.13451  | 0.00692 | 0.01955 | 0.00063 | 0.00685 | 0.00027 | 170±63  | 128±6   | 125±4   | 138±5   |
| 40 | 343   | 450  | 0.76 | 0.04898 | 0.00193 | 0.13643  | 0.0057  | 0.01981 | 0.00062 | 0.007   | 0.00025 | 147±46  | 130±5   | 126±4   | 141±5   |
| 41 | 128   | 163  | 0.78 | 0.04937 | 0.00269 | 0.13307  | 0.0066  | 0.01947 | 0.00063 | 0.00679 | 0.0003  | 165±59  | 127±6   | 124±4   | 137±6   |
| 42 | 89.9  | 107  | 0.84 | 0.04605 | 0.00297 | 0.11856  | 0.00653 | 0.01867 | 0.00063 | 0.00651 | 0.00034 | 566±142 | 114±6   | 119±4   | 131±7   |
| 43 | 242   | 231  | 1.05 | 0.06434 | 0.00195 | 1.08427  | 0.03552 | 0.1191  | 0.00357 | 0.0387  | 0.00118 | 753±31  | 746±17  | 725±21  | 767±23  |
| 44 | 138   | 164  | 0.84 | 0.04619 | 0.00505 | 0.12547  | 0.01313 | 0.0197  | 0.00063 | 0.00628 | 0.00024 | 8±220   | 120±12  | 126±4   | 127±5   |
| 45 | 128   | 116  | 1.10 | 0.05194 | 0.00367 | 0.14472  | 0.00943 | 0.02009 | 0.00071 | 0.00732 | 0.00037 | 283±86  | 137±8   | 128±4   | 147±8   |
| 46 | 111   | 109  | 1.02 | 0.04674 | 0.00287 | 0.12553  | 0.00714 | 0.0195  | 0.00064 | 0.00676 | 0.00028 | 36±66   | 120±6   | 125±4   | 136±6   |
| 47 | 73.0  | 68.1 | 1.07 | 0.06331 | 0.00244 | 1.04679  | 0.04044 | 0.11804 | 0.00372 | 0.03771 | 0.00131 | 719±37  | 727±20  | 719±21  | 748±25  |
| 48 | 122   | 131  | 0.93 | 0.04993 | 0.00318 | 0.13294  | 0.00792 | 0.01937 | 0.00066 | 0.00695 | 0.00031 | 192±77  | 127±7   | 124±4   | 140±6   |
| 49 | 358   | 312  | 1.15 | 0.06258 | 0.00192 | 1.06116  | 0.03494 | 0.12017 | 0.00376 | 0.03967 | 0.00125 | 694±32  | 734±17  | 732±22  | 786±24  |
| 50 | 107   | 134  | 0.80 | 0.04575 | 0.00292 | 0.12365  | 0.00735 | 0.01949 | 0.00063 | 0.00676 | 0.00032 | -15±69  | 118±7   | 124±4   | 136±6   |
| 51 | 456   | 409  | 1.11 | 0.06379 | 0.00189 | 1.07669  | 0.03333 | 0.11955 | 0.00369 | 0.03959 | 0.00126 | 735±30  | 742±16  | 728±21  | 785±24  |
| 52 | 136   | 147  | 0.93 | 0.04818 | 0.00338 | 0.12656  | 0.00851 | 0.01878 | 0.00067 | 0.0066  | 0.00031 | 108±87  | 121±8   | 120±4   | 133±6   |
| 53 | 72.7  | 74.0 | 0.98 | 0.06664 | 0.00261 | 1.11755  | 0.04315 | 0.11921 | 0.00374 | 0.03901 | 0.00137 | 826±37  | 762±21  | 726±22  | 773±27  |
| 54 | 151   | 190  | 0.79 | 0.05115 | 0.0029  | 0.14182  | 0.00761 | 0.02017 | 0.00069 | 0.00688 | 0.00033 | 248±65  | 135±7   | 129±4   | 139±7   |
| 55 | 59.9  | 32.7 | 1.83 | 0.06881 | 0.00339 | 1.14419  | 0.05308 | 0.11979 | 0.00406 | 0.04025 | 0.00142 | 893±46  | 774±25  | 729±23  | 798±28  |
| 56 | 171   | 202  | 0.85 | 0.04605 | 0.00341 | 0.12859  | 0.00857 | 0.02025 | 0.00066 | 0.00669 | 0.00024 | 219±164 | 123±8   | 129±4   | 135±5   |
| 57 | 191   | 164  | 1.16 | 0.05229 | 0.00426 | 0.1471   | 0.01137 | 0.02045 | 0.00073 | 0.00714 | 0.00037 | 298±112 | 139±10  | 131±5   | 144±7   |
| 58 | 158   | 319  | 0.50 | 0.15867 | 0.00465 | 10.34476 | 0.32318 | 0.45955 | 0.01433 | 0.13514 | 0.00406 | 2442±24 | 2466±29 | 2438±63 | 2562±72 |
| 59 | 100   | 126  | 0.79 | 0.04605 | 0.00362 | 0.12307  | 0.00882 | 0.01938 | 0.00063 | 0.00646 | 0.00028 | 314±172 | 118±8   | 124±4   | 130±6   |
| 60 | 375   | 307  | 1.22 | 0.04605 | 0.00384 | 0.12132  | 0.00936 | 0.01911 | 0.0006  | 0.00627 | 0.00019 | 319±183 | 116±8   | 122±4   | 126±4   |
| 61 | 104   | 136  | 0.77 | 0.05282 | 0.00443 | 0.14108  | 0.01059 | 0.01955 | 0.00075 | 0.00731 | 0.00044 | 321±102 | 134±9   | 125±5   | 147±9   |
| 62 | 35.9  | 44.0 | 0.82 | 0.05508 | 0.00577 | 0.16343  | 0.01573 | 0.02212 | 0.00094 | 0.00811 | 0.00072 | 416±140 | 154±14  | 141±6   | 163±15  |
| 63 | 104   | 134  | 0.78 | 0.05248 | 0.00344 | 0.15512  | 0.01029 | 0.02132 | 0.00074 | 0.0071  | 0.00036 | 306±90  | 146±9   | 136±5   | 143±7   |
| 64 | 94.1  | 126  | 0.75 | 0.05248 | 0.00313 | 0.14095  | 0.00772 | 0.01973 | 0.00068 | 0.00654 | 0.00033 | 306±66  | 134±7   | 126±4   | 132±7   |
| 65 | 159   | 278  | 0.57 | 0.04723 | 0.00221 | 0.13339  | 0.00671 | 0.0202  | 0.00071 | 0.00667 | 0.00028 | 61±55   | 127±6   | 129±4   | 134±6   |
| 66 | 162   | 158  | 1.03 | 0.04604 | 0.0027  | 0.12451  | 0.00716 | 0.01981 | 0.00073 | 0.00653 | 0.00028 | 341±60  | 119±6   | 126±5   | 131±6   |
| 67 | 132   | 88.2 | 1.49 | 0.05507 | 0.00429 | 0.14836  | 0.01085 | 0.02006 | 0.00077 | 0.00696 | 0.00035 | 415±96  | 140±10  | 128±5   | 140±7   |
| 68 | 212   | 217  | 0.98 | 0.06214 | 0.00218 | 1.07862  | 0.03908 | 0.12493 | 0.00432 | 0.03796 | 0.00123 | 679±35  | 743±19  | 759±25  | 753±24  |
| 69 | 372   | 435  | 0.86 | 0.0474  | 0.00193 | 0.12971  | 0.00538 | 0.01953 | 0.00064 | 0.00636 | 0.00024 | 69±45   | 124±5   | 125±4   | 128±5   |
| 70 | 177   | 131  | 1.36 | 0.05104 | 0.00284 | 0.13354  | 0.007   | 0.01963 | 0.00072 | 0.00679 | 0.00026 | 243±59  | 127±6   | 125±5   | 137±5   |

|    |      |      |      |         |         |          |         |         |         |         |         |          |         |         |         |
|----|------|------|------|---------|---------|----------|---------|---------|---------|---------|---------|----------|---------|---------|---------|
| 71 | 121  | 149  | 0.81 | 0.04973 | 0.00278 | 0.14099  | 0.00775 | 0.0205  | 0.00071 | 0.00665 | 0.00029 | 182±67   | 134±7   | 131±4   | 134±6   |
| 72 | 78.0 | 183  | 0.43 | 0.15885 | 0.00473 | 10.27472 | 0.32846 | 0.4619  | 0.01508 | 0.13631 | 0.00431 | 2443±25  | 2460±30 | 2448±67 | 2583±77 |
| 73 | 118  | 120  | 0.99 | 0.05355 | 0.00395 | 0.14776  | 0.01273 | 0.01999 | 0.0007  | 0.00758 | 0.00041 | 352±132  | 140±11  | 128±4   | 153±8   |
| 74 | 214  | 222  | 0.96 | 0.04859 | 0.00245 | 0.13423  | 0.007   | 0.01959 | 0.00065 | 0.00667 | 0.00026 | 128±63   | 128±6   | 125±4   | 134±5   |
| 75 | 66.2 | 66.4 | 1.00 | 0.06365 | 0.00251 | 1.09622  | 0.04262 | 0.12525 | 0.00432 | 0.04057 | 0.00138 | 730±37   | 752±21  | 761±25  | 804±27  |
| 76 | 69.1 | 97.6 | 0.71 | 0.06196 | 0.00229 | 1.10415  | 0.04257 | 0.12816 | 0.00445 | 0.04082 | 0.00146 | 673±37   | 755±21  | 777±25  | 809±28  |
| 77 | 211  | 190  | 1.11 | 0.04726 | 0.0024  | 0.13524  | 0.00678 | 0.02082 | 0.00074 | 0.00695 | 0.00029 | 62±55    | 129±6   | 133±5   | 140±6   |
| 78 | 129  | 153  | 0.84 | 0.04605 | 0.00313 | 0.12663  | 0.00739 | 0.01994 | 0.00069 | 0.00675 | 0.00027 | 404±150  | 121±7   | 127±4   | 136±5   |
| 79 | 140  | 185  | 0.75 | 0.05195 | 0.00321 | 0.14435  | 0.00952 | 0.01995 | 0.00078 | 0.00722 | 0.00032 | 283±82   | 137±8   | 127±5   | 145±6   |
| 80 | 75.4 | 115  | 0.66 | 0.04795 | 0.00313 | 0.13368  | 0.00848 | 0.02016 | 0.00069 | 0.00641 | 0.00031 | 97±81    | 127±8   | 129±4   | 129±6   |
| 81 | 281  | 338  | 0.83 | 0.04819 | 0.00233 | 0.13846  | 0.00678 | 0.02091 | 0.00075 | 0.00698 | 0.00028 | 109±55   | 132±6   | 133±5   | 141±6   |
| 82 | 269  | 239  | 1.12 | 0.04998 | 0.00254 | 0.15532  | 0.0086  | 0.02206 | 0.00086 | 0.00745 | 0.00032 | 194±63   | 147±8   | 141±5   | 150±6   |
| 83 | 96.9 | 161  | 0.60 | 0.06524 | 0.00239 | 1.1779   | 0.045   | 0.13132 | 0.00495 | 0.04353 | 0.00156 | 782±37   | 790±21  | 795±28  | 861±30  |
| 84 | 101  | 94.3 | 1.07 | 0.05297 | 0.00346 | 0.14426  | 0.00886 | 0.01989 | 0.00074 | 0.00627 | 0.00033 | 328±75   | 137±8   | 127±5   | 126±7   |
| 85 | 110  | 183  | 0.60 | 0.04861 | 0.00266 | 0.13902  | 0.00731 | 0.02109 | 0.00081 | 0.00723 | 0.00035 | 129±59   | 132±7   | 135±5   | 146±7   |
| 86 | 125  | 143  | 0.87 | 0.04668 | 0.00299 | 0.13419  | 0.00808 | 0.0211  | 0.00076 | 0.00684 | 0.00031 | 33±68    | 128±7   | 135±5   | 138±6   |
| 87 | 175  | 185  | 0.95 | 0.05071 | 0.00292 | 0.13965  | 0.00766 | 0.02047 | 0.00076 | 0.00669 | 0.00029 | 228±64   | 133±7   | 131±5   | 135±6   |
| 88 | 169  | 477  | 0.35 | 0.04872 | 0.00197 | 0.14439  | 0.00595 | 0.02151 | 0.00076 | 0.00732 | 0.00031 | 134±43   | 137±5   | 137±5   | 147±6   |
| 89 | 177  | 232  | 0.76 | 0.05264 | 0.00293 | 0.14787  | 0.00832 | 0.0204  | 0.00085 | 0.00771 | 0.00039 | 314±61   | 140±7   | 130±5   | 155±8   |
| 90 | 226  | 298  | 0.76 | 0.04652 | 0.00217 | 0.13604  | 0.00648 | 0.0211  | 0.00077 | 0.00696 | 0.00028 | 24±46    | 130±6   | 135±5   | 140±6   |
| 91 | 159  | 148  | 1.07 | 0.04806 | 0.00307 | 0.13194  | 0.00791 | 0.02041 | 0.00078 | 0.00645 | 0.00028 | 102±71   | 126±7   | 130±5   | 130±6   |
| 92 | 74.1 | 70.8 | 1.05 | 0.06257 | 0.0025  | 1.04364  | 0.04148 | 0.12079 | 0.00437 | 0.03761 | 0.00136 | 694±38   | 726±21  | 735±25  | 746±27  |
| 93 | 96.7 | 139  | 0.69 | 0.06402 | 0.00238 | 1.17333  | 0.044   | 0.13211 | 0.00456 | 0.04216 | 0.00141 | 742±35   | 788±21  | 800±26  | 835±27  |
| 94 | 104  | 84.4 | 1.23 | 0.07064 | 0.00286 | 1.22613  | 0.05007 | 0.12676 | 0.00478 | 0.04411 | 0.00155 | 947±37   | 813±23  | 769±27  | 872±30  |
| 95 | 45.0 | 41.7 | 1.08 | 0.06513 | 0.00315 | 1.08587  | 0.05354 | 0.12139 | 0.0047  | 0.03993 | 0.00158 | 779±48   | 746±26  | 739±27  | 791±31  |
| 96 | 216  | 448  | 0.48 | 0.05063 | 0.0021  | 0.14482  | 0.00634 | 0.02047 | 0.00077 | 0.00686 | 0.00028 | 224±45   | 137±6   | 131±5   | 138±6   |
| 97 | 98.6 | 98.9 | 1.00 | 0.05469 | 0.00443 | 0.15037  | 0.01019 | 0.02061 | 0.00086 | 0.00634 | 0.00034 | 400±81   | 142±9   | 131±5   | 128±7   |
| 98 | 115  | 196  | 0.59 | 0.04605 | 0.00489 | 0.13453  | 0.01252 | 0.02119 | 0.00108 | 0.0072  | 0.00046 | 1029±214 | 128±11  | 135±7   | 145±9   |
| 99 | 93.0 | 124  | 0.75 | 0.05054 | 0.00351 | 0.13493  | 0.00837 | 0.02001 | 0.00091 | 0.00723 | 0.00037 | 220±69   | 129±7   | 128±6   | 146±7   |

#### 9124 zircon U-Pb dating results

|    |      |     |      |         |         |         |         |         |         |         |         |         |        |       |       |
|----|------|-----|------|---------|---------|---------|---------|---------|---------|---------|---------|---------|--------|-------|-------|
| 01 | 116  | 155 | 0.75 | 0.04533 | 0.00277 | 0.12241 | 0.00731 | 0.0195  | 0.00068 | 0.00704 | 0.00033 | -3±104  | 117±7  | 125±4 | 142±7 |
| 02 | 110  | 139 | 0.79 | 0.05226 | 0.00324 | 0.14088 | 0.00858 | 0.01949 | 0.00067 | 0.00651 | 0.00032 | 297±118 | 134±8  | 124±4 | 131±7 |
| 03 | 102  | 136 | 0.75 | 0.04932 | 0.00308 | 0.13324 | 0.00775 | 0.0197  | 0.00069 | 0.00661 | 0.00032 | 163±107 | 127±7  | 126±4 | 133±6 |
| 04 | 622  | 370 | 1.68 | 0.0478  | 0.00203 | 0.12682 | 0.00551 | 0.01897 | 0.00063 | 0.00627 | 0.00023 | 89±65   | 121±5  | 121±4 | 126±5 |
| 05 | 211  | 256 | 0.83 | 0.04737 | 0.00235 | 0.13334 | 0.00708 | 0.02006 | 0.00071 | 0.00639 | 0.00027 | 68±88   | 127±6  | 128±4 | 129±5 |
| 06 | 99.8 | 131 | 0.76 | 0.04663 | 0.00305 | 0.12888 | 0.00799 | 0.02027 | 0.00075 | 0.00675 | 0.00036 | 30±107  | 123±7  | 129±5 | 136±7 |
| 07 | 111  | 104 | 1.07 | 0.05374 | 0.00606 | 0.14961 | 0.01448 | 0.02031 | 0.00102 | 0.00634 | 0.00043 | 360±190 | 142±13 | 130±6 | 128±9 |
| 08 | 232  | 225 | 1.03 | 0.05038 | 0.0027  | 0.13154 | 0.00708 | 0.01881 | 0.00063 | 0.00609 | 0.00026 | 212±100 | 125±6  | 120±4 | 123±5 |
| 09 | 149  | 145 | 1.03 | 0.05248 | 0.00286 | 0.1466  | 0.00794 | 0.02004 | 0.0007  | 0.00678 | 0.00029 | 306±96  | 139±7  | 128±4 | 136±6 |
| 10 | 116  | 197 | 0.59 | 0.04947 | 0.00259 | 0.14519 | 0.00787 | 0.02114 | 0.00076 | 0.00757 | 0.00038 | 170±95  | 138±7  | 135±5 | 152±8 |
| 11 | 138  | 157 | 0.88 | 0.04998 | 0.00305 | 0.13583 | 0.00844 | 0.01971 | 0.0007  | 0.00681 | 0.00035 | 194±118 | 129±8  | 126±4 | 137±7 |
| 12 | 89.2 | 124 | 0.72 | 0.04804 | 0.00299 | 0.13307 | 0.00842 | 0.02002 | 0.00069 | 0.00704 | 0.00037 | 101±119 | 127±8  | 128±4 | 142±7 |
| 13 | 154  | 153 | 1.01 | 0.05216 | 0.00309 | 0.1402  | 0.00785 | 0.0196  | 0.00066 | 0.00702 | 0.00032 | 292±104 | 133±7  | 125±4 | 141±7 |
| 14 | 217  | 211 | 1.03 | 0.0511  | 0.00295 | 0.14545 | 0.00829 | 0.02041 | 0.00067 | 0.00699 | 0.00029 | 245±109 | 138±7  | 130±4 | 141±6 |
| 15 | 86.9 | 119 | 0.73 | 0.05283 | 0.00375 | 0.13945 | 0.009   | 0.01927 | 0.0007  | 0.00731 | 0.00044 | 321±124 | 133±8  | 123±4 | 147±9 |

|    |      |      |      |         |         |         |         |         |         |         |         |         |        |        |        |
|----|------|------|------|---------|---------|---------|---------|---------|---------|---------|---------|---------|--------|--------|--------|
| 16 | 79.2 | 103  | 0.77 | 0.05598 | 0.0044  | 0.15058 | 0.01029 | 0.02028 | 0.00072 | 0.00688 | 0.0004  | 451±133 | 142±9  | 129±5  | 139±8  |
| 17 | 151  | 203  | 0.74 | 0.04372 | 0.00249 | 0.1184  | 0.00653 | 0.01949 | 0.00064 | 0.0068  | 0.00031 | -85±96  | 114±6  | 124±4  | 137±6  |
| 18 | 69.6 | 125  | 0.56 | 0.04719 | 0.00327 | 0.11882 | 0.00723 | 0.0187  | 0.00067 | 0.00674 | 0.00035 | 59±108  | 114±7  | 119±4  | 136±7  |
| 19 | 196  | 185  | 1.06 | 0.05363 | 0.00311 | 0.14047 | 0.00771 | 0.01916 | 0.00067 | 0.0069  | 0.00027 | 356±98  | 133±7  | 122±4  | 139±5  |
| 20 | 94.0 | 116  | 0.81 | 0.05364 | 0.0041  | 0.13973 | 0.0098  | 0.0189  | 0.00071 | 0.00698 | 0.00039 | 356±138 | 133±9  | 121±4  | 141±8  |
| 21 | 205  | 429  | 0.48 | 0.04727 | 0.00382 | 0.12802 | 0.00943 | 0.01964 | 0.00066 | 0.00624 | 0.00022 | 63±181  | 122±8  | 125±4  | 126±4  |
| 22 | 411  | 387  | 1.06 | 0.04996 | 0.00233 | 0.1376  | 0.00637 | 0.01984 | 0.00066 | 0.00661 | 0.00027 | 193±76  | 131±6  | 127±4  | 133±6  |
| 23 | 613  | 520  | 1.18 | 0.04803 | 0.00201 | 0.13537 | 0.00571 | 0.02017 | 0.00067 | 0.00648 | 0.00023 | 101±61  | 129±5  | 129±4  | 131±5  |
| 24 | 109  | 118  | 0.93 | 0.05426 | 0.00457 | 0.14406 | 0.01125 | 0.01941 | 0.0008  | 0.00709 | 0.00045 | 382±153 | 137±10 | 124±5  | 143±9  |
| 25 | 126  | 145  | 0.87 | 0.05343 | 0.00338 | 0.15251 | 0.00914 | 0.02066 | 0.00073 | 0.00642 | 0.0003  | 347±112 | 144±8  | 132±5  | 129±6  |
| 26 | 85.7 | 120  | 0.72 | 0.05114 | 0.00375 | 0.13566 | 0.00916 | 0.01944 | 0.00067 | 0.0067  | 0.00035 | 247±134 | 129±8  | 124±4  | 135±7  |
| 27 | 92.4 | 120  | 0.77 | 0.0526  | 0.00404 | 0.14146 | 0.01082 | 0.01931 | 0.0007  | 0.0072  | 0.00042 | 312±156 | 134±10 | 123±4  | 145±8  |
| 28 | 60.7 | 79.0 | 0.77 | 0.05679 | 0.00497 | 0.14507 | 0.01102 | 0.0196  | 0.00074 | 0.0072  | 0.00043 | 483±150 | 138±10 | 125±5  | 145±9  |
| 29 | 69.5 | 65.9 | 1.05 | 0.04651 | 0.00432 | 0.1175  | 0.00922 | 0.01908 | 0.00072 | 0.00658 | 0.00039 | 24±152  | 113±8  | 122±5  | 132±8  |
| 30 | 105  | 96.5 | 1.09 | 0.05441 | 0.00532 | 0.15024 | 0.01258 | 0.02038 | 0.00097 | 0.00665 | 0.00046 | 388±159 | 142±11 | 130±6  | 134±9  |
| 31 | 137  | 163  | 0.84 | 0.05359 | 0.00367 | 0.14601 | 0.00951 | 0.01968 | 0.00068 | 0.00617 | 0.00029 | 354±128 | 138±8  | 126±4  | 124±6  |
| 32 | 299  | 322  | 0.93 | 0.04556 | 0.00208 | 0.12514 | 0.00596 | 0.01938 | 0.00062 | 0.00627 | 0.00024 | -25±74  | 120±5  | 124±4  | 126±5  |
| 33 | 135  | 161  | 0.84 | 0.04731 | 0.00263 | 0.1279  | 0.00665 | 0.01944 | 0.00063 | 0.00662 | 0.0003  | 65±90   | 122±6  | 124±4  | 133±6  |
| 34 | 186  | 189  | 0.99 | 0.04733 | 0.00254 | 0.13162 | 0.00678 | 0.02004 | 0.00067 | 0.00669 | 0.0003  | 66±87   | 126±6  | 128±4  | 135±6  |
| 35 | 230  | 188  | 1.22 | 0.04605 | 0.0037  | 0.12387 | 0.00902 | 0.01951 | 0.00066 | 0.00651 | 0.00025 | 322±177 | 119±8  | 125±4  | 131±5  |
| 36 | 98.3 | 97.5 | 1.01 | 0.04556 | 0.00399 | 0.11657 | 0.00864 | 0.01934 | 0.00071 | 0.00675 | 0.00034 | -25±141 | 112±8  | 123±5  | 136±7  |
| 37 | 108  | 128  | 0.84 | 0.04854 | 0.00314 | 0.13605 | 0.00856 | 0.01989 | 0.00065 | 0.00684 | 0.00034 | 126±121 | 130±8  | 127±4  | 138±7  |
| 38 | 10.5 | 89.1 | 0.12 | 0.04693 | 0.00287 | 0.2194  | 0.01326 | 0.0333  | 0.00117 | 0.00983 | 0.00079 | 46±107  | 201±11 | 211±7  | 198±16 |
| 39 | 153  | 181  | 0.85 | 0.04604 | 0.00254 | 0.12227 | 0.00638 | 0.01908 | 0.00066 | 0.00669 | 0.00032 | 467±83  | 117±6  | 122±4  | 135±6  |
| 40 | 105  | 122  | 0.86 | 0.04692 | 0.00316 | 0.12855 | 0.0083  | 0.01987 | 0.0007  | 0.00736 | 0.00036 | 45±118  | 123±7  | 127±4  | 148±7  |
| 41 | 119  | 162  | 0.74 | 0.04707 | 0.00301 | 0.12917 | 0.00798 | 0.01965 | 0.0007  | 0.00676 | 0.00033 | 53±111  | 123±7  | 125±4  | 136±7  |
| 42 | 105  | 136  | 0.77 | 0.05157 | 0.00352 | 0.14089 | 0.00882 | 0.01973 | 0.00068 | 0.00692 | 0.00034 | 267±122 | 134±8  | 126±4  | 139±7  |
| 43 | 189  | 247  | 0.76 | 0.05269 | 0.00289 | 0.14742 | 0.00773 | 0.02019 | 0.00065 | 0.00726 | 0.00031 | 315±97  | 140±7  | 129±4  | 146±6  |
| 44 | 266  | 287  | 0.93 | 0.04741 | 0.00217 | 0.13186 | 0.00622 | 0.01955 | 0.00063 | 0.00693 | 0.00026 | 70±76   | 126±6  | 125±4  | 139±5  |
| 45 | 281  | 231  | 1.21 | 0.04968 | 0.00263 | 0.13299 | 0.00647 | 0.01935 | 0.00064 | 0.00723 | 0.00028 | 180±84  | 127±6  | 124±4  | 146±6  |
| 46 | 1029 | 769  | 1.34 | 0.06372 | 0.00191 | 1.0918  | 0.03449 | 0.12048 | 0.00373 | 0.03996 | 0.00119 | 732±14  | 749±17 | 733±21 | 792±23 |
| 47 | 98.4 | 106  | 0.93 | 0.05079 | 0.00351 | 0.13763 | 0.00907 | 0.01934 | 0.00069 | 0.00687 | 0.00036 | 232±129 | 131±8  | 124±4  | 138±7  |
| 48 | 544  | 497  | 1.10 | 0.05022 | 0.00258 | 0.1414  | 0.00766 | 0.01993 | 0.00065 | 0.00663 | 0.00024 | 205±103 | 134±7  | 127±4  | 134±5  |
| 49 | 85.7 | 124  | 0.69 | 0.05242 | 0.00387 | 0.14059 | 0.01051 | 0.01913 | 0.00072 | 0.00686 | 0.00042 | 304±149 | 134±9  | 122±5  | 138±8  |
| 50 | 126  | 152  | 0.83 | 0.05163 | 0.00289 | 0.14417 | 0.00819 | 0.01981 | 0.00072 | 0.00724 | 0.00034 | 269±103 | 137±7  | 126±5  | 146±7  |
| 51 | 245  | 290  | 0.84 | 0.04947 | 0.00219 | 0.1364  | 0.00619 | 0.01969 | 0.00067 | 0.00667 | 0.00027 | 170±71  | 130±6  | 126±4  | 134±5  |
| 52 | 83.6 | 72.6 | 1.15 | 0.05508 | 0.00586 | 0.15813 | 0.01413 | 0.02151 | 0.00085 | 0.00665 | 0.00044 | 415±185 | 149±12 | 137±5  | 134±9  |
| 53 | 138  | 147  | 0.94 | 0.0536  | 0.00354 | 0.13999 | 0.00883 | 0.01913 | 0.00074 | 0.00639 | 0.00034 | 354±115 | 133±8  | 122±5  | 129±7  |
| 54 | 122  | 119  | 1.03 | 0.06329 | 0.00237 | 1.04799 | 0.04008 | 0.1174  | 0.00389 | 0.0386  | 0.00137 | 718±42  | 728±20 | 716±22 | 766±27 |
| 55 | 104  | 141  | 0.73 | 0.05377 | 0.00384 | 0.14545 | 0.00957 | 0.01963 | 0.00074 | 0.00724 | 0.00039 | 362±125 | 138±8  | 125±5  | 146±8  |
| 56 | 82.8 | 116  | 0.71 | 0.05221 | 0.00339 | 0.14036 | 0.00895 | 0.01934 | 0.0007  | 0.0066  | 0.00036 | 295±123 | 133±8  | 123±4  | 133±7  |
| 57 | 437  | 823  | 0.53 | 0.04786 | 0.00197 | 0.10269 | 0.00433 | 0.01529 | 0.00053 | 0.00516 | 0.00021 | 93±58   | 99±4   | 98±3   | 104±4  |
| 58 | 134  | 140  | 0.96 | 0.05172 | 0.00416 | 0.15571 | 0.01228 | 0.02127 | 0.00088 | 0.00778 | 0.00051 | 273±155 | 147±11 | 136±6  | 157±10 |
| 59 | 105  | 109  | 0.96 | 0.05234 | 0.0039  | 0.15476 | 0.01054 | 0.02174 | 0.00087 | 0.00769 | 0.00045 | 300±129 | 146±9  | 139±5  | 155±9  |
| 60 | 247  | 625  | 0.40 | 0.0518  | 0.0024  | 0.15361 | 0.00752 | 0.02118 | 0.00079 | 0.00713 | 0.00036 | 277±75  | 145±7  | 135±5  | 144±7  |



|    |      |      |      |         |         |         |         |         |         |         |         |         |        |        |        |
|----|------|------|------|---------|---------|---------|---------|---------|---------|---------|---------|---------|--------|--------|--------|
| 61 | 163  | 201  | 0.81 | 0.05266 | 0.00291 | 0.14254 | 0.00816 | 0.01924 | 0.00067 | 0.00721 | 0.00031 | 314±106 | 135±7  | 123±4  | 145±6  |
| 62 | 140  | 186  | 0.76 | 0.05398 | 0.00302 | 0.14278 | 0.00759 | 0.01921 | 0.00066 | 0.00703 | 0.00035 | 370±93  | 136±7  | 123±4  | 142±7  |
| 63 | 101  | 124  | 0.81 | 0.05487 | 0.0036  | 0.1457  | 0.00885 | 0.01958 | 0.00071 | 0.00736 | 0.00037 | 407±112 | 138±8  | 125±5  | 148±7  |
| 64 | 276  | 305  | 0.90 | 0.04818 | 0.00255 | 0.13304 | 0.00698 | 0.02    | 0.00075 | 0.00696 | 0.00028 | 108±84  | 127±6  | 128±5  | 140±6  |
| 65 | 222  | 198  | 1.12 | 0.04988 | 0.00297 | 0.1375  | 0.00784 | 0.02013 | 0.00076 | 0.00725 | 0.00029 | 189±100 | 131±7  | 128±5  | 146±6  |
| 66 | 60.3 | 71.8 | 0.84 | 0.05296 | 0.00548 | 0.13705 | 0.01203 | 0.01949 | 0.0008  | 0.00748 | 0.00048 | 327±178 | 130±11 | 124±5  | 151±10 |
| 67 | 163  | 160  | 1.02 | 0.05244 | 0.00311 | 0.14459 | 0.00904 | 0.01973 | 0.00079 | 0.00649 | 0.00033 | 305±113 | 137±8  | 126±5  | 131±7  |
| 68 | 236  | 254  | 0.93 | 0.04832 | 0.00261 | 0.12763 | 0.00639 | 0.01939 | 0.00076 | 0.00679 | 0.00029 | 115±73  | 122±6  | 124±5  | 137±6  |
| 69 | 169  | 221  | 0.76 | 0.05125 | 0.00294 | 0.13616 | 0.00775 | 0.01906 | 0.00071 | 0.00706 | 0.00032 | 252±101 | 130±7  | 122±5  | 142±6  |
| 70 | 134  | 179  | 0.75 | 0.05292 | 0.00364 | 0.14052 | 0.00925 | 0.01917 | 0.00081 | 0.00723 | 0.00038 | 325±117 | 134±8  | 122±5  | 146±8  |
| 71 | 112  | 144  | 0.78 | 0.05449 | 0.00349 | 0.14673 | 0.0091  | 0.01993 | 0.0008  | 0.00783 | 0.0004  | 391±108 | 139±8  | 127±5  | 158±8  |
| 72 | 172  | 214  | 0.80 | 0.04605 | 0.00357 | 0.1242  | 0.00841 | 0.01956 | 0.00074 | 0.00653 | 0.00028 | 331±173 | 119±8  | 125±5  | 132±6  |
| 73 | 130  | 152  | 0.85 | 0.05111 | 0.00299 | 0.1373  | 0.00842 | 0.01953 | 0.00077 | 0.00671 | 0.00031 | 246±110 | 131±8  | 125±5  | 135±6  |
| 74 | 241  | 284  | 0.85 | 0.0529  | 0.00314 | 0.14522 | 0.00743 | 0.02026 | 0.00078 | 0.00744 | 0.00033 | 324±78  | 138±7  | 129±5  | 150±7  |
| 75 | 196  | 233  | 0.84 | 0.04979 | 0.00381 | 0.14126 | 0.01276 | 0.01968 | 0.00093 | 0.00832 | 0.00049 | 185±175 | 134±11 | 126±6  | 167±10 |
| 76 | 205  | 239  | 0.86 | 0.05185 | 0.00265 | 0.13926 | 0.00788 | 0.01899 | 0.00082 | 0.00705 | 0.00031 | 279±85  | 132±7  | 121±5  | 142±6  |
| 77 | 141  | 168  | 0.84 | 0.05204 | 0.00285 | 0.14743 | 0.00844 | 0.02029 | 0.00076 | 0.00734 | 0.00034 | 287±102 | 140±7  | 130±5  | 148±7  |
| 78 | 285  | 260  | 1.10 | 0.05491 | 0.00317 | 0.1529  | 0.0082  | 0.02051 | 0.00082 | 0.00699 | 0.00032 | 409±82  | 144±7  | 131±5  | 141±6  |
| 79 | 159  | 193  | 0.82 | 0.05077 | 0.00289 | 0.14388 | 0.00836 | 0.02099 | 0.00088 | 0.00734 | 0.00031 | 230±95  | 136±7  | 134±6  | 148±6  |
| 80 | 128  | 146  | 0.88 | 0.05432 | 0.00362 | 0.14697 | 0.00879 | 0.02035 | 0.00085 | 0.00681 | 0.00036 | 384±98  | 139±8  | 130±5  | 137±7  |
| 81 | 207  | 211  | 0.98 | 0.05256 | 0.00347 | 0.14347 | 0.00826 | 0.02014 | 0.00084 | 0.00674 | 0.00031 | 310±93  | 136±7  | 129±5  | 136±6  |
| 82 | 213  | 200  | 1.06 | 0.0503  | 0.00326 | 0.13772 | 0.00918 | 0.02032 | 0.00081 | 0.00676 | 0.00035 | 209±124 | 131±8  | 130±5  | 136±7  |
| 83 | 198  | 204  | 0.97 | 0.0533  | 0.0031  | 0.15481 | 0.00842 | 0.02139 | 0.00087 | 0.00698 | 0.00031 | 342±84  | 146±7  | 136±5  | 141±6  |
| 84 | 209  | 206  | 1.01 | 0.05174 | 0.00313 | 0.13871 | 0.00808 | 0.01954 | 0.0008  | 0.00692 | 0.00029 | 274±97  | 132±7  | 125±5  | 139±6  |
| 85 | 87.8 | 119  | 0.74 | 0.04864 | 0.00319 | 0.13385 | 0.0084  | 0.0201  | 0.0008  | 0.00742 | 0.00037 | 131±110 | 128±8  | 128±5  | 149±7  |
| 86 | 123  | 175  | 0.70 | 0.05174 | 0.00309 | 0.14255 | 0.00809 | 0.02039 | 0.00077 | 0.0071  | 0.00033 | 274±100 | 135±7  | 130±5  | 143±7  |
| 87 | 123  | 121  | 1.02 | 0.05355 | 0.00514 | 0.16225 | 0.01432 | 0.02214 | 0.00095 | 0.00768 | 0.00047 | 352±178 | 153±13 | 141±6  | 155±9  |
| 88 | 182  | 198  | 0.92 | 0.04983 | 0.00318 | 0.13983 | 0.00824 | 0.02104 | 0.00086 | 0.0074  | 0.00035 | 187±99  | 133±7  | 134±5  | 149±7  |
| 89 | 730  | 432  | 1.69 | 0.04994 | 0.00218 | 0.14183 | 0.00623 | 0.02069 | 0.00076 | 0.00723 | 0.00025 | 192±57  | 135±6  | 132±5  | 146±5  |
| 90 | 85.7 | 111  | 0.77 | 0.056   | 0.00431 | 0.15029 | 0.01076 | 0.02025 | 0.0008  | 0.0074  | 0.0004  | 452±136 | 142±10 | 129±5  | 149±8  |
| 91 | 449  | 483  | 0.93 | 0.05023 | 0.00214 | 0.1405  | 0.00634 | 0.02028 | 0.00077 | 0.00654 | 0.00024 | 206±58  | 133±6  | 129±5  | 132±5  |
| 92 | 113  | 147  | 0.77 | 0.04607 | 0.0031  | 0.12369 | 0.00809 | 0.02014 | 0.00081 | 0.00722 | 0.00038 | 1±112   | 118±7  | 129±5  | 145±8  |
| 93 | 73.9 | 68.8 | 1.07 | 0.06781 | 0.00274 | 1.1454  | 0.05001 | 0.12354 | 0.00488 | 0.04144 | 0.00168 | 863±39  | 775±24 | 751±28 | 821±33 |
| 94 | 280  | 398  | 0.70 | 0.05201 | 0.00224 | 0.15165 | 0.00691 | 0.02106 | 0.00078 | 0.00769 | 0.00029 | 286±62  | 143±6  | 134±5  | 155±6  |
| 95 | 38.6 | 49.3 | 0.78 | 0.06909 | 0.00335 | 1.17458 | 0.05873 | 0.12607 | 0.00539 | 0.04171 | 0.00175 | 901±55  | 789±27 | 765±31 | 826±34 |

# 9125 zircon U-Pb dating results

|    |      |      |      |         |         |         |         |         |         |         |         |          |         |         |         |
|----|------|------|------|---------|---------|---------|---------|---------|---------|---------|---------|----------|---------|---------|---------|
| 01 | 426  | 390  | 1.09 | 0.05209 | 0.00248 | 0.13539 | 0.00682 | 0.01848 | 0.00061 | 0.00666 | 0.00024 | 289±59   | 129±6   | 118±4   | 134±5   |
| 02 | 225  | 325  | 0.69 | 0.04605 | 0.00365 | 0.12126 | 0.00882 | 0.0191  | 0.00060 | 0.00617 | 0.00020 | 338±174  | 116±8   | 122±4   | 124±4   |
| 03 | 18.2 | 627  | 0.03 | 0.05069 | 0.00161 | 0.24065 | 0.00786 | 0.03373 | 0.00102 | 0.01142 | 0.00074 | 227±34   | 219±6   | 214±6   | 230±15  |
| 04 | 349  | 324  | 1.07 | 0.04605 | 0.00375 | 0.12495 | 0.00953 | 0.01968 | 0.00056 | 0.00706 | 0.00054 | 1964±179 | 120±9   | 126±4   | 142±11  |
| 05 | 818  | 463  | 1.77 | 0.0533  | 0.00217 | 0.14176 | 0.00562 | 0.01908 | 0.00058 | 0.00663 | 0.0002  | 342±42   | 135±5   | 122±4   | 134±4   |
| 06 | 186  | 420  | 0.44 | 0.15981 | 0.00443 | 9.04709 | 0.26055 | 0.40078 | 0.01163 | 0.12025 | 0.00345 | 2454±22  | 2343±26 | 2173±54 | 2295±62 |
| 07 | 139  | 200  | 0.69 | 0.04605 | 0.00329 | 0.12833 | 0.00831 | 0.02021 | 0.00061 | 0.00663 | 0.00025 | 333±158  | 123±7   | 129±4   | 134±5   |
| 08 | 179  | 87.3 | 2.05 | 0.05535 | 0.00553 | 0.1539  | 0.01286 | 0.02079 | 0.00086 | 0.00642 | 0.00033 | 427±114  | 145±11  | 133±5   | 129±7   |
| 09 | 261  | 252  | 1.04 | 0.04605 | 0.00421 | 0.12923 | 0.01113 | 0.02035 | 0.00062 | 0.00661 | 0.00021 | 334±197  | 123±10  | 130±4   | 133±4   |

|    |      |      |      |         |         |         |         |         |         |         |         |         |        |        |        |
|----|------|------|------|---------|---------|---------|---------|---------|---------|---------|---------|---------|--------|--------|--------|
| 10 | 231  | 194  | 1.19 | 0.04996 | 0.00238 | 0.13876 | 0.00664 | 0.01989 | 0.00064 | 0.00708 | 0.00026 | 193±56  | 132±6  | 127±4  | 143±5  |
| 11 | 182  | 246  | 0.74 | 0.05213 | 0.00318 | 0.14666 | 0.00858 | 0.02054 | 0.00069 | 0.00717 | 0.00031 | 291±75  | 139±8  | 131±4  | 144±6  |
| 12 | 315  | 263  | 1.20 | 0.04778 | 0.00222 | 0.12969 | 0.00593 | 0.01944 | 0.0006  | 0.00649 | 0.00023 | 88±54   | 124±5  | 124±4  | 131±5  |
| 13 | 296  | 167  | 1.77 | 0.06581 | 0.00207 | 1.12568 | 0.03659 | 0.12146 | 0.00371 | 0.03947 | 0.0012  | 800±30  | 766±17 | 739±21 | 782±23 |
| 14 | 106  | 115  | 0.92 | 0.04605 | 0.00335 | 0.13388 | 0.00867 | 0.02109 | 0.00070 | 0.00732 | 0.00043 | 324±161 | 128±8  | 135±4  | 147±9  |
| 15 | 224  | 226  | 0.99 | 0.04596 | 0.0022  | 0.13027 | 0.00621 | 0.02023 | 0.00065 | 0.00695 | 0.00027 | -4±46   | 124±6  | 129±4  | 140±5  |
| 16 | 168  | 187  | 0.90 | 0.04585 | 0.00218 | 0.12618 | 0.00607 | 0.01968 | 0.00066 | 0.00664 | 0.00027 | -10±46  | 121±5  | 126±4  | 134±5  |
| 17 | 221  | 280  | 0.79 | 0.04557 | 0.00234 | 0.12813 | 0.0066  | 0.02003 | 0.00066 | 0.0066  | 0.00027 | -25±53  | 122±6  | 128±4  | 133±5  |
| 18 | 404  | 298  | 1.36 | 0.0511  | 0.00329 | 0.13186 | 0.00933 | 0.01787 | 0.00062 | 0.00682 | 0.00027 | 245±100 | 126±8  | 114±4  | 137±6  |
| 19 | 218  | 168  | 1.30 | 0.04913 | 0.00282 | 0.13029 | 0.00767 | 0.01896 | 0.00067 | 0.00636 | 0.00027 | 154±74  | 124±7  | 121±4  | 128±5  |
| 20 | 91.3 | 125  | 0.73 | 0.05129 | 0.00297 | 0.13647 | 0.00759 | 0.01912 | 0.00061 | 0.00722 | 0.00032 | 254±71  | 130±7  | 122±4  | 145±6  |
| 21 | 332  | 422  | 0.79 | 0.0519  | 0.00235 | 0.13725 | 0.00655 | 0.01875 | 0.00065 | 0.00711 | 0.00027 | 281±53  | 131±6  | 120±4  | 143±5  |
| 22 | 437  | 363  | 1.21 | 0.04605 | 0.00305 | 0.11855 | 0.007   | 0.01867 | 0.00056 | 0.00618 | 0.00018 | 242±146 | 114±6  | 119±4  | 125±4  |
| 23 | 352  | 476  | 0.74 | 0.04785 | 0.00186 | 0.13753 | 0.00546 | 0.02049 | 0.00063 | 0.00716 | 0.00024 | 92±43   | 131±5  | 131±4  | 144±5  |
| 24 | 179  | 234  | 0.76 | 0.05281 | 0.00242 | 0.14436 | 0.00656 | 0.01971 | 0.00063 | 0.00708 | 0.00026 | 321±51  | 137±6  | 126±4  | 143±5  |
| 25 | 73.4 | 124  | 0.59 | 0.05065 | 0.0039  | 0.12136 | 0.00967 | 0.01696 | 0.00059 | 0.00611 | 0.00041 | 225±118 | 116±9  | 108±4  | 123±8  |
| 26 | 264  | 379  | 0.70 | 0.04605 | 0.00327 | 0.12617 | 0.00805 | 0.01987 | 0.00062 | 0.00647 | 0.00020 | 185±157 | 121±7  | 127±4  | 130±4  |
| 27 | 246  | 280  | 0.88 | 0.04605 | 0.00305 | 0.12044 | 0.00703 | 0.01897 | 0.00059 | 0.00629 | 0.00020 | 209±146 | 115±6  | 121±4  | 127±4  |
| 28 | 161  | 261  | 0.62 | 0.04605 | 0.00314 | 0.11301 | 0.00659 | 0.0178  | 0.00063 | 0.00605 | 0.00027 | 260±150 | 109±6  | 114±4  | 122±5  |
| 29 | 196  | 192  | 1.02 | 0.04716 | 0.00231 | 0.12944 | 0.00632 | 0.01943 | 0.00067 | 0.00673 | 0.00028 | 57±53   | 124±6  | 124±4  | 135±6  |
| 30 | 86.4 | 120  | 0.72 | 0.05017 | 0.00319 | 0.13343 | 0.00832 | 0.01921 | 0.00066 | 0.00683 | 0.00032 | 203±83  | 127±7  | 123±4  | 138±6  |
| 31 | 189  | 170  | 1.11 | 0.05087 | 0.00396 | 0.12871 | 0.01103 | 0.01778 | 0.00073 | 0.00681 | 0.00037 | 235±121 | 123±10 | 114±5  | 137±8  |
| 32 | 96.7 | 83.6 | 1.16 | 0.06614 | 0.00247 | 1.15669 | 0.04413 | 0.12407 | 0.00392 | 0.04155 | 0.00134 | 811±36  | 780±21 | 754±22 | 823±26 |
| 33 | 59.5 | 53.4 | 1.11 | 0.05338 | 0.00515 | 0.12893 | 0.01099 | 0.01765 | 0.00073 | 0.0076  | 0.00048 | 345±119 | 123±10 | 113±5  | 153±10 |
| 34 | 573  | 300  | 1.91 | 0.06859 | 0.00218 | 1.13824 | 0.04016 | 0.11651 | 0.0036  | 0.03907 | 0.00119 | 886±33  | 772±19 | 710±21 | 775±23 |
| 35 | 171  | 311  | 0.55 | 0.04524 | 0.00198 | 0.12951 | 0.00562 | 0.02052 | 0.00066 | 0.00667 | 0.00027 | -7±39   | 124±5  | 131±4  | 134±5  |
| 36 | 87.6 | 111  | 0.79 | 0.04605 | 0.00508 | 0.12567 | 0.01324 | 0.01979 | 0.00065 | 0.00636 | 0.00026 | 352±223 | 120±12 | 126±4  | 128±5  |
| 37 | 213  | 319  | 0.67 | 0.0472  | 0.00196 | 0.13084 | 0.00566 | 0.01962 | 0.00061 | 0.00702 | 0.00026 | 59±47   | 125±5  | 125±4  | 141±5  |
| 38 | 107  | 137  | 0.78 | 0.04729 | 0.00268 | 0.13312 | 0.00763 | 0.02021 | 0.00067 | 0.00686 | 0.0003  | 64±69   | 127±7  | 129±4  | 138±6  |
| 39 | 144  | 193  | 0.75 | 0.06309 | 0.00201 | 1.08135 | 0.03588 | 0.12172 | 0.00383 | 0.04052 | 0.00132 | 711±32  | 744±18 | 740±22 | 803±26 |
| 40 | 29.7 | 40.2 | 0.74 | 0.05373 | 0.00385 | 0.24888 | 0.01605 | 0.03394 | 0.00123 | 0.01166 | 0.00076 | 360±82  | 226±13 | 215±8  | 234±15 |
| 41 | 361  | 357  | 1.01 | 0.04605 | 0.00287 | 0.12386 | 0.00666 | 0.01951 | 0.00062 | 0.00654 | 0.00022 | 225±137 | 119±6  | 125±4  | 132±4  |
| 42 | 683  | 442  | 1.55 | 0.04728 | 0.00189 | 0.1257  | 0.00506 | 0.01895 | 0.0006  | 0.00625 | 0.00022 | 63±43   | 120±5  | 121±4  | 126±4  |
| 43 | 86.3 | 59.0 | 1.46 | 0.0679  | 0.00273 | 1.08986 | 0.04674 | 0.11352 | 0.00375 | 0.03757 | 0.00141 | 865±41  | 748±23 | 693±22 | 745±27 |
| 44 | 302  | 308  | 0.98 | 0.04534 | 0.00193 | 0.12407 | 0.00537 | 0.01961 | 0.00066 | 0.00694 | 0.00027 | -2±38   | 119±5  | 125±4  | 140±5  |
| 45 | 190  | 195  | 0.98 | 0.0513  | 0.0026  | 0.14411 | 0.00715 | 0.02017 | 0.00068 | 0.00735 | 0.00031 | 254±57  | 137±6  | 129±4  | 148±6  |
| 46 | 796  | 535  | 1.49 | 0.05137 | 0.00237 | 0.13283 | 0.00651 | 0.0183  | 0.00059 | 0.00669 | 0.00023 | 258±57  | 127±6  | 117±4  | 135±5  |
| 47 | 226  | 291  | 0.78 | 0.04934 | 0.00222 | 0.13943 | 0.00645 | 0.02    | 0.00063 | 0.00764 | 0.00031 | 164±54  | 133±6  | 128±4  | 154±6  |
| 48 | 264  | 392  | 0.67 | 0.04809 | 0.00188 | 0.1326  | 0.00526 | 0.01965 | 0.00063 | 0.00652 | 0.00025 | 104±43  | 126±5  | 125±4  | 131±5  |
| 49 | 49.3 | 62.1 | 0.79 | 0.06434 | 0.00246 | 1.10164 | 0.04342 | 0.12204 | 0.00387 | 0.04194 | 0.00149 | 753±38  | 754±21 | 742±22 | 831±29 |
| 50 | 501  | 631  | 0.79 | 0.04927 | 0.00176 | 0.13607 | 0.00501 | 0.01955 | 0.0006  | 0.00682 | 0.00023 | 161±39  | 130±4  | 125±4  | 137±5  |
| 51 | 347  | 232  | 1.50 | 0.05348 | 0.00265 | 0.14671 | 0.00695 | 0.01972 | 0.00063 | 0.00652 | 0.00025 | 349±54  | 139±6  | 126±4  | 131±5  |
| 52 | 295  | 385  | 0.77 | 0.04926 | 0.00192 | 0.13585 | 0.00533 | 0.01967 | 0.00062 | 0.00657 | 0.00024 | 160±42  | 129±5  | 126±4  | 132±5  |
| 53 | 160  | 171  | 0.94 | 0.04766 | 0.00267 | 0.1312  | 0.00751 | 0.01961 | 0.00063 | 0.00685 | 0.00029 | 83±72   | 125±7  | 125±4  | 138±6  |
| 54 | 49.4 | 51.7 | 0.96 | 0.0612  | 0.00248 | 1.01979 | 0.0419  | 0.11922 | 0.00388 | 0.03669 | 0.00142 | 646±41  | 714±21 | 726±22 | 728±28 |

|    |      |      |      |         |         |         |         |         |         |         |         |         |         |         |         |
|----|------|------|------|---------|---------|---------|---------|---------|---------|---------|---------|---------|---------|---------|---------|
| 55 | 180  | 242  | 0.75 | 0.04556 | 0.00226 | 0.1277  | 0.00628 | 0.02002 | 0.00063 | 0.0068  | 0.00028 | -25±50  | 122±6   | 128±4   | 137±6   |
| 56 | 113  | 95.1 | 1.18 | 0.06418 | 0.00231 | 1.09135 | 0.04163 | 0.1202  | 0.00379 | 0.04024 | 0.0014  | 747±36  | 749±20  | 732±22  | 797±27  |
| 57 | 313  | 331  | 0.95 | 0.04605 | 0.00404 | 0.12634 | 0.01025 | 0.0199  | 0.00066 | 0.00651 | 0.00022 | 230±191 | 121±9   | 127±4   | 131±4   |
| 58 | 283  | 361  | 0.79 | 0.04833 | 0.00193 | 0.13808 | 0.00589 | 0.02018 | 0.00067 | 0.00718 | 0.00028 | 115±47  | 131±5   | 129±4   | 145±6   |
| 59 | 161  | 164  | 0.98 | 0.04763 | 0.00241 | 0.13655 | 0.00714 | 0.02037 | 0.00069 | 0.0068  | 0.00029 | 81±61   | 130±6   | 130±4   | 137±6   |
| 60 | 77.2 | 315  | 0.24 | 0.05482 | 0.00201 | 0.30279 | 0.01201 | 0.03927 | 0.00135 | 0.01704 | 0.00073 | 405±40  | 269±9   | 248±8   | 342±15  |
| 61 | 359  | 356  | 1.01 | 0.04605 | 0.00469 | 0.12224 | 0.01178 | 0.01925 | 0.00063 | 0.0062  | 0.00019 | 304±209 | 117±11  | 123±4   | 125±4   |
| 62 | 182  | 290  | 0.63 | 0.04883 | 0.0022  | 0.13373 | 0.00596 | 0.01959 | 0.00062 | 0.00674 | 0.00029 | 140±51  | 127±5   | 125±4   | 136±6   |
| 63 | 413  | 223  | 1.85 | 0.06908 | 0.0022  | 1.14002 | 0.0385  | 0.11689 | 0.00356 | 0.03765 | 0.00115 | 901±31  | 773±18  | 713±21  | 747±22  |
| 64 | 234  | 239  | 0.98 | 0.04847 | 0.00237 | 0.12998 | 0.00632 | 0.01923 | 0.00062 | 0.00641 | 0.00025 | 122±58  | 124±6   | 123±4   | 129±5   |
| 65 | 207  | 218  | 0.95 | 0.0487  | 0.00239 | 0.13694 | 0.00673 | 0.02026 | 0.00064 | 0.00677 | 0.00027 | 133±60  | 130±6   | 129±4   | 136±5   |
| 66 | 689  | 585  | 1.18 | 0.08659 | 0.00243 | 2.7728  | 0.08153 | 0.22719 | 0.00672 | 0.07114 | 0.00205 | 1351±26 | 1348±22 | 1320±35 | 1389±39 |
| 67 | 210  | 411  | 0.51 | 0.04714 | 0.0018  | 0.12637 | 0.00486 | 0.01915 | 0.00058 | 0.00626 | 0.00023 | 56±41   | 121±4   | 122±4   | 126±5   |
| 68 | 362  | 186  | 1.95 | 0.05043 | 0.00261 | 0.13806 | 0.00731 | 0.01955 | 0.00063 | 0.00702 | 0.00025 | 215±65  | 131±7   | 125±4   | 141±5   |
| 69 | 14.1 | 999  | 0.01 | 0.05122 | 0.00232 | 0.23803 | 0.0081  | 0.03371 | 0.00101 | 0.01061 | 0.0004  | 251±107 | 217±7   | 214±6   | 213±8   |
| 70 | 372  | 432  | 0.86 | 0.08743 | 0.00249 | 2.79641 | 0.08451 | 0.22708 | 0.00685 | 0.0713  | 0.00205 | 1370±27 | 1355±23 | 1319±36 | 1392±39 |
| 71 | 190  | 267  | 0.71 | 0.04605 | 0.0029  | 0.11591 | 0.00621 | 0.01826 | 0.00061 | 0.00622 | 0.00028 | 276±138 | 111±6   | 117±4   | 125±6   |
| 72 | 125  | 139  | 0.90 | 0.04649 | 0.00361 | 0.12085 | 0.00881 | 0.01873 | 0.00066 | 0.00622 | 0.0003  | 23±94   | 116±8   | 120±4   | 125±6   |
| 73 | 229  | 295  | 0.77 | 0.04605 | 0.0032  | 0.13144 | 0.00802 | 0.0207  | 0.00069 | 0.00686 | 0.00028 | 249±153 | 125±7   | 132±4   | 138±6   |
| 74 | 120  | 112  | 1.07 | 0.04837 | 0.00302 | 0.12973 | 0.00819 | 0.01952 | 0.00068 | 0.00662 | 0.0003  | 117±82  | 124±7   | 125±4   | 133±6   |
| 75 | 265  | 248  | 1.07 | 0.04881 | 0.00244 | 0.12466 | 0.00614 | 0.01856 | 0.00062 | 0.00614 | 0.00027 | 139±58  | 119±6   | 119±4   | 124±5   |
| 76 | 165  | 247  | 0.67 | 0.04801 | 0.00214 | 0.13127 | 0.00611 | 0.01951 | 0.00062 | 0.00694 | 0.00027 | 100±54  | 125±5   | 125±4   | 140±5   |
| 77 | 540  | 952  | 0.57 | 0.0498  | 0.00164 | 0.13918 | 0.00509 | 0.01981 | 0.00062 | 0.00695 | 0.00023 | 186±38  | 132±5   | 126±4   | 140±5   |
| 78 | 86.9 | 141  | 0.62 | 0.06805 | 0.00234 | 1.12441 | 0.04088 | 0.1172  | 0.00357 | 0.04057 | 0.00132 | 870±34  | 765±20  | 714±21  | 804±26  |
| 79 | 606  | 480  | 1.26 | 0.04605 | 0.00268 | 0.11722 | 0.00579 | 0.01846 | 0.00057 | 0.00621 | 0.00021 | 284±127 | 113±5   | 118±4   | 125±4   |
| 80 | 130  | 138  | 0.94 | 0.04605 | 0.00526 | 0.12432 | 0.0136  | 0.01958 | 0.00064 | 0.00626 | 0.00024 | 367±226 | 119±12  | 125±4   | 126±5   |
| 81 | 191  | 258  | 0.74 | 0.04605 | 0.00266 | 0.12398 | 0.00608 | 0.01953 | 0.0006  | 0.00653 | 0.00023 | 205±126 | 119±5   | 125±4   | 132±5   |
| 82 | 178  | 201  | 0.89 | 0.05327 | 0.0026  | 0.14565 | 0.00706 | 0.01965 | 0.00063 | 0.00715 | 0.00027 | 340±56  | 138±6   | 125±4   | 144±5   |
| 83 | 235  | 251  | 0.94 | 0.04712 | 0.00209 | 0.1286  | 0.00557 | 0.01971 | 0.00065 | 0.00648 | 0.00024 | 55±46   | 123±5   | 126±4   | 131±5   |
| 84 | 118  | 150  | 0.79 | 0.06593 | 0.00221 | 1.09655 | 0.03672 | 0.11895 | 0.00368 | 0.03801 | 0.00123 | 804±31  | 752±18  | 725±21  | 754±24  |
| 85 | 135  | 243  | 0.56 | 0.0499  | 0.00233 | 0.13697 | 0.0062  | 0.01978 | 0.00064 | 0.00693 | 0.0003  | 190±51  | 130±6   | 126±4   | 140±6   |
| 86 | 211  | 311  | 0.68 | 0.04874 | 0.00212 | 0.13434 | 0.00597 | 0.01966 | 0.00062 | 0.00675 | 0.00026 | 135±51  | 128±5   | 126±4   | 136±5   |
| 87 | 544  | 489  | 1.11 | 0.0486  | 0.0019  | 0.13012 | 0.00518 | 0.01921 | 0.00064 | 0.00634 | 0.00022 | 128±42  | 124±5   | 123±4   | 128±4   |
| 88 | 119  | 230  | 0.52 | 0.05341 | 0.00258 | 0.14906 | 0.00727 | 0.02004 | 0.00066 | 0.00682 | 0.00029 | 346±56  | 141±6   | 128±4   | 137±6   |
| 89 | 283  | 315  | 0.90 | 0.04683 | 0.00232 | 0.12447 | 0.00587 | 0.01932 | 0.00066 | 0.00657 | 0.00027 | 41±49   | 119±5   | 123±4   | 132±5   |
| 90 | 260  | 292  | 0.89 | 0.05041 | 0.00216 | 0.13701 | 0.00592 | 0.01972 | 0.00068 | 0.0067  | 0.00025 | 214±46  | 130±5   | 126±4   | 135±5   |
| 91 | 173  | 194  | 0.89 | 0.04605 | 0.00292 | 0.12448 | 0.00669 | 0.01961 | 0.00066 | 0.00664 | 0.00026 | 328±139 | 119±6   | 125±4   | 134±5   |
| 92 | 311  | 340  | 0.92 | 0.05265 | 0.00211 | 0.14255 | 0.00595 | 0.0194  | 0.00062 | 0.00642 | 0.00025 | 314±44  | 135±5   | 124±4   | 129±5   |
| 93 | 19.0 | 28.6 | 0.67 | 0.05832 | 0.00387 | 0.54312 | 0.03698 | 0.06807 | 0.00373 | 0.0217  | 0.00118 | 542±68  | 440±24  | 424±23  | 434±23  |
| 94 | 12.7 | 54.8 | 0.23 | 0.05702 | 0.00575 | 0.28739 | 0.02463 | 0.03824 | 0.00164 | 0.01342 | 0.00096 | 492±114 | 257±19  | 242±10  | 269±19  |
| 95 | 782  | 235  | 3.33 | 0.05122 | 0.00438 | 0.14347 | 0.0126  | 0.01989 | 0.00083 | 0.00632 | 0.00024 | 251±125 | 136±11  | 127±5   | 127±5   |

#### 1217 zircon U-Pb dating results

|    |      |      |      |         |         |         |         |         |         |         |         |         |        |        |        |
|----|------|------|------|---------|---------|---------|---------|---------|---------|---------|---------|---------|--------|--------|--------|
| 01 | 74.1 | 61.2 | 1.21 | 0.0615  | 0.0029  | 1.00044 | 0.04837 | 0.11715 | 0.0039  | 0.03332 | 0.00181 | 657±77  | 704±25 | 714±22 | 663±35 |
| 02 | 184  | 98.6 | 1.86 | 0.04889 | 0.00397 | 0.12771 | 0.0096  | 0.01923 | 0.00067 | 0.00578 | 0.00038 | 143±151 | 122±9  | 123±4  | 116±8  |
| 03 | 35.9 | 25.6 | 1.40 | 0.05874 | 0.0063  | 0.38623 | 0.04218 | 0.04863 | 0.0023  | 0.01319 | 0.00109 | 557±223 | 332±31 | 306±14 | 265±22 |

|    |      |      |      |         |         |         |         |         |         |         |         |         |         |         |          |
|----|------|------|------|---------|---------|---------|---------|---------|---------|---------|---------|---------|---------|---------|----------|
| 04 | 3.34 | 113  | 0.03 | 0.05032 | 0.0029  | 0.22712 | 0.01316 | 0.03325 | 0.0012  | 0.01785 | 0.00582 | 210±107 | 208±11  | 211±7   | 358±116  |
| 05 | 38.2 | 72.9 | 0.52 | 0.05464 | 0.00358 | 0.31678 | 0.01938 | 0.0429  | 0.00147 | 0.01603 | 0.00118 | 397±117 | 279±15  | 271±9   | 321±24   |
| 06 | 153  | 119  | 1.29 | 0.05249 | 0.00403 | 0.14634 | 0.00998 | 0.0209  | 0.00073 | 0.00568 | 0.00036 | 307±137 | 139±9   | 133±5   | 114±7    |
| 07 | 156  | 164  | 0.96 | 0.05657 | 0.00306 | 0.39121 | 0.02175 | 0.05005 | 0.00234 | 0.01461 | 0.00084 | 475±68  | 335±16  | 315±14  | 293±17   |
| 08 | 112  | 108  | 1.04 | 0.05379 | 0.00507 | 0.31187 | 0.02153 | 0.04326 | 0.00169 | 0.01242 | 0.0008  | 362±132 | 276±17  | 273±10  | 249±16   |
| 09 | 248  | 144  | 1.72 | 0.06156 | 0.00257 | 1.12066 | 0.04686 | 0.13005 | 0.00423 | 0.03624 | 0.00168 | 659±58  | 763±22  | 788±24  | 719±33   |
| 10 | 2.69 | 30.6 | 0.09 | 0.10817 | 0.00428 | 5.0635  | 0.2108  | 0.33386 | 0.0111  | 0.12678 | 0.01685 | 1769±47 | 1830±35 | 1857±54 | 2413±302 |
| 11 | 351  | 392  | 0.90 | 0.04724 | 0.00231 | 0.13503 | 0.00653 | 0.0206  | 0.00067 | 0.006   | 0.00032 | 61±79   | 129±6   | 131±4   | 121±6    |
| 12 | 166  | 372  | 0.45 | 0.04895 | 0.00204 | 0.26959 | 0.01163 | 0.03944 | 0.00132 | 0.02652 | 0.00135 | 146±65  | 242±9   | 249±8   | 529±27   |
| 13 | 202  | 176  | 1.15 | 0.06269 | 0.00261 | 0.6838  | 0.0291  | 0.07789 | 0.00242 | 0.02798 | 0.00129 | 698±63  | 529±18  | 484±14  | 558±25   |
| 14 | 279  | 119  | 2.35 | 0.04412 | 0.0039  | 0.12141 | 0.01028 | 0.0199  | 0.00069 | 0.00574 | 0.00031 | -65±163 | 116±9   | 127±4   | 116±6    |
| 15 | 217  | 184  | 1.18 | 0.04992 | 0.00346 | 0.12959 | 0.00834 | 0.01905 | 0.00062 | 0.00643 | 0.00039 | 191±128 | 124±7   | 122±4   | 130±8    |
| 16 | 319  | 355  | 0.90 | 0.06282 | 0.00233 | 1.10882 | 0.04125 | 0.12603 | 0.00382 | 0.03744 | 0.0017  | 702±47  | 758±20  | 765±22  | 743±33   |
| 17 | 32.2 | 24.9 | 1.29 | 0.15412 | 0.00628 | 9.71134 | 0.40917 | 0.45152 | 0.015   | 0.13355 | 0.00702 | 2392±45 | 2408±39 | 2402±67 | 2534±125 |
| 18 | 33.0 | 320  | 0.10 | 0.05213 | 0.00251 | 0.24256 | 0.01148 | 0.03345 | 0.00105 | 0.01147 | 0.00117 | 291±83  | 221±9   | 212±7   | 231±23   |
| 19 | 60.1 | 201  | 0.30 | 0.05    | 0.00262 | 0.29236 | 0.01776 | 0.04068 | 0.00159 | 0.01658 | 0.00145 | 195±109 | 260±14  | 257±10  | 332±29   |
| 20 | 62.0 | 68.6 | 0.90 | 0.05604 | 0.00574 | 0.15049 | 0.01286 | 0.02046 | 0.00084 | 0.00849 | 0.00074 | 454±172 | 142±11  | 131±5   | 171±15   |
| 21 | 48.7 | 95.3 | 0.51 | 0.06544 | 0.00275 | 1.04023 | 0.0449  | 0.11344 | 0.00352 | 0.0379  | 0.00215 | 789±64  | 724±22  | 693±20  | 752±42   |
| 22 | 211  | 129  | 1.63 | 0.05281 | 0.00395 | 0.13736 | 0.00943 | 0.01948 | 0.00065 | 0.0069  | 0.00045 | 321±140 | 131±8   | 124±4   | 139±9    |
| 23 | 158  | 65.1 | 2.42 | 0.06993 | 0.00304 | 1.55029 | 0.07122 | 0.15746 | 0.00497 | 0.05043 | 0.00241 | 926±70  | 951±28  | 943±28  | 994±46   |
| 24 | 174  | 63.4 | 2.75 | 0.05824 | 0.00678 | 0.1407  | 0.01487 | 0.01915 | 0.00074 | 0.00629 | 0.00051 | 539±223 | 134±13  | 122±5   | 127±10   |
| 25 | 194  | 371  | 0.52 | 0.1025  | 0.00404 | 3.38066 | 0.14605 | 0.23462 | 0.00812 | 0.07045 | 0.00396 | 1670±49 | 1500±34 | 1359±42 | 1376±75  |
| 26 | 34.1 | 126  | 0.27 | 0.04851 | 0.00306 | 0.2631  | 0.01654 | 0.03901 | 0.00135 | 0.01546 | 0.00123 | 124±119 | 237±13  | 247±8   | 310±24   |
| 27 | 65.9 | 47.9 | 1.38 | 0.05605 | 0.00521 | 0.30442 | 0.02516 | 0.03918 | 0.00143 | 0.01263 | 0.00091 | 454±170 | 270±20  | 248±9   | 254±18   |
| 28 | 231  | 175  | 1.32 | 0.05393 | 0.00366 | 0.15432 | 0.00983 | 0.02099 | 0.00071 | 0.00696 | 0.00042 | 368±125 | 146±9   | 134±4   | 140±8    |
| 29 | 210  | 161  | 1.30 | 0.05535 | 0.00458 | 0.14669 | 0.01088 | 0.01975 | 0.00069 | 0.00691 | 0.00043 | 426±150 | 139±10  | 126±4   | 139±9    |
| 30 | 219  | 299  | 0.73 | 0.05371 | 0.00341 | 0.19525 | 0.01276 | 0.02579 | 0.00089 | 0.00841 | 0.00056 | 359±129 | 181±11  | 164±6   | 169±11   |
| 31 | 148  | 81.4 | 1.82 | 0.05224 | 0.0056  | 0.13498 | 0.01249 | 0.01876 | 0.00087 | 0.00606 | 0.00055 | 296±185 | 129±11  | 120±5   | 122±11   |
| 32 | 116  | 53.0 | 2.19 | 0.06949 | 0.00383 | 1.13196 | 0.06456 | 0.11683 | 0.00392 | 0.03393 | 0.00183 | 913±97  | 769±31  | 712±23  | 674±36   |
| 33 | 374  | 122  | 3.06 | 0.04996 | 0.00414 | 0.12211 | 0.00884 | 0.01854 | 0.00068 | 0.00553 | 0.00032 | 193±143 | 117±8   | 118±4   | 111±6    |
| 34 | 278  | 124  | 2.25 | 0.06427 | 0.00281 | 1.14417 | 0.05187 | 0.127   | 0.00413 | 0.03673 | 0.00183 | 751±68  | 774±25  | 771±24  | 729±36   |
| 35 | 377  | 193  | 1.96 | 0.04718 | 0.00297 | 0.13494 | 0.00854 | 0.02057 | 0.0007  | 0.00594 | 0.00034 | 58±117  | 129±8   | 131±4   | 120±7    |
| 36 | 52.5 | 41.5 | 1.27 | 0.06398 | 0.00372 | 1.08406 | 0.06251 | 0.12091 | 0.00406 | 0.03583 | 0.00214 | 741±102 | 746±30  | 736±23  | 712±42   |
| 37 | 282  | 277  | 1.02 | 0.04986 | 0.00293 | 0.13155 | 0.00799 | 0.01893 | 0.00063 | 0.00631 | 0.00036 | 189±118 | 125±7   | 121±4   | 127±7    |
| 38 | 283  | 250  | 1.13 | 0.05338 | 0.00338 | 0.14451 | 0.00836 | 0.01983 | 0.00064 | 0.00618 | 0.00036 | 345±111 | 137±7   | 127±4   | 125±7    |
| 39 | 291  | 91.2 | 3.19 | 0.04841 | 0.00465 | 0.11784 | 0.00964 | 0.01802 | 0.00066 | 0.00555 | 0.00034 | 120±165 | 113±9   | 115±4   | 112±7    |
| 40 | 304  | 318  | 0.96 | 0.04913 | 0.00261 | 0.13416 | 0.0071  | 0.01953 | 0.00065 | 0.00602 | 0.00036 | 154±96  | 128±6   | 125±4   | 121±7    |
| 41 | 65.7 | 59.4 | 1.11 | 0.05299 | 0.00712 | 0.17875 | 0.02219 | 0.02417 | 0.00119 | 0.01035 | 0.00136 | 328±261 | 167±19  | 154±7   | 208±27   |
| 42 | 165  | 127  | 1.30 | 0.04494 | 0.00398 | 0.11806 | 0.00888 | 0.01928 | 0.00071 | 0.00653 | 0.00046 | -23±144 | 113±8   | 123±4   | 132±9    |
| 43 | 557  | 88.1 | 6.31 | 0.04809 | 0.00495 | 0.12127 | 0.01244 | 0.01916 | 0.00076 | 0.00564 | 0.00031 | 104±210 | 116±11  | 122±5   | 114±6    |
| 44 | 383  | 260  | 1.47 | 0.04749 | 0.00257 | 0.13122 | 0.00729 | 0.01976 | 0.00066 | 0.00659 | 0.00037 | 74±98   | 125±7   | 126±4   | 133±7    |
| 45 | 127  | 111  | 1.14 | 0.06298 | 0.00364 | 0.64654 | 0.03738 | 0.07395 | 0.00251 | 0.03217 | 0.00166 | 708±102 | 506±23  | 460±15  | 640±33   |
| 46 | 108  | 83.0 | 1.30 | 0.06622 | 0.00293 | 1.23885 | 0.05517 | 0.13386 | 0.00416 | 0.03878 | 0.00192 | 813±68  | 818±25  | 810±24  | 769±37   |
| 47 | 260  | 220  | 1.18 | 0.04771 | 0.00291 | 0.13659 | 0.00794 | 0.02121 | 0.00069 | 0.00667 | 0.00039 | 85±107  | 130±7   | 135±4   | 134±8    |
| 48 | 383  | 157  | 2.45 | 0.05158 | 0.00398 | 0.12894 | 0.00962 | 0.01832 | 0.00064 | 0.00599 | 0.00034 | 267±153 | 123±9   | 117±4   | 121±7    |

|    |      |      |      |         |         |         |         |         |         |         |         |          |         |         |          |
|----|------|------|------|---------|---------|---------|---------|---------|---------|---------|---------|----------|---------|---------|----------|
| 49 | 13.2 | 348  | 0.04 | 0.05223 | 0.0025  | 0.2468  | 0.01213 | 0.03427 | 0.00111 | 0.02277 | 0.00254 | 296±87   | 224±10  | 217±7   | 455±50   |
| 50 | 226  | 112  | 2.03 | 0.05173 | 0.00406 | 0.13916 | 0.01144 | 0.01953 | 0.00069 | 0.00607 | 0.00037 | 273±171  | 132±10  | 125±4   | 122±7    |
| 51 | 67.9 | 132  | 0.52 | 0.06943 | 0.00299 | 1.12973 | 0.05174 | 0.11662 | 0.00375 | 0.03911 | 0.00234 | 911±69   | 768±25  | 711±22  | 775±46   |
| 52 | 309  | 518  | 0.60 | 0.04917 | 0.00242 | 0.13193 | 0.00674 | 0.01934 | 0.00062 | 0.00674 | 0.00037 | 156±93   | 126±6   | 123±4   | 136±7    |
| 53 | 30.6 | 263  | 0.12 | 0.05151 | 0.0026  | 0.23572 | 0.01218 | 0.03337 | 0.00107 | 0.00976 | 0.0009  | 264±95   | 215±10  | 212±7   | 196±18   |
| 54 | 106  | 124  | 0.85 | 0.06669 | 0.00297 | 1.13195 | 0.05119 | 0.12505 | 0.00423 | 0.04052 | 0.0023  | 828±64   | 769±24  | 760±24  | 803±45   |
| 55 | 396  | 363  | 1.09 | 0.05443 | 0.00288 | 0.14859 | 0.00799 | 0.02004 | 0.00065 | 0.00661 | 0.00041 | 389±99   | 141±7   | 128±4   | 133±8    |
| 56 | 330  | 250  | 1.32 | 0.05346 | 0.00387 | 0.14294 | 0.01078 | 0.01933 | 0.00066 | 0.00691 | 0.00043 | 348±156  | 136±10  | 123±4   | 139±9    |
| 57 | 274  | 278  | 0.99 | 0.06841 | 0.00253 | 1.14692 | 0.04473 | 0.12082 | 0.00389 | 0.03791 | 0.00187 | 881±47   | 776±21  | 735±22  | 752±36   |
| 58 | 39.1 | 25.4 | 1.54 | 0.06015 | 0.01481 | 0.14082 | 0.0262  | 0.01973 | 0.00127 | 0.00873 | 0.00106 | 609±390  | 134±23  | 126±8   | 176±21   |
| 59 | 183  | 117  | 1.56 | 0.05332 | 0.00413 | 0.14085 | 0.0104  | 0.01922 | 0.00068 | 0.00619 | 0.0004  | 342±151  | 134±9   | 123±4   | 125±8    |
| 60 | 427  | 489  | 0.87 | 0.05046 | 0.00254 | 0.11076 | 0.00559 | 0.01579 | 0.00053 | 0.00519 | 0.00032 | 216±90   | 107±5   | 101±3   | 105±6    |
| 61 | 61.5 | 321  | 0.19 | 0.13055 | 0.00673 | 6.01915 | 0.23218 | 0.3344  | 0.01143 | 0.09505 | 0.00327 | 2105±93  | 1979±34 | 1860±55 | 1835±60  |
| 62 | 45.3 | 371  | 0.12 | 0.11601 | 0.0045  | 4.52262 | 0.18754 | 0.27668 | 0.01132 | 0.08807 | 0.00637 | 1896±12  | 1735±34 | 1575±57 | 1706±118 |
| 63 | 277  | 198  | 1.40 | 0.05185 | 0.00383 | 0.13602 | 0.00923 | 0.01898 | 0.00069 | 0.00693 | 0.00044 | 279±134  | 129±8   | 121±4   | 140±9    |
| 64 | 148  | 126  | 1.18 | 0.15785 | 0.00654 | 8.56991 | 0.38275 | 0.38867 | 0.01906 | 0.13272 | 0.00736 | 2433±116 | 2293±41 | 2117±88 | 2519±131 |
| 65 | 168  | 195  | 0.86 | 0.10225 | 0.00361 | 4.18367 | 0.14866 | 0.28916 | 0.00939 | 0.08345 | 0.0039  | 1665±27  | 1671±29 | 1637±47 | 1620±73  |
| 66 | 15.2 | 155  | 0.10 | 0.04789 | 0.00306 | 0.22463 | 0.01372 | 0.03384 | 0.00119 | 0.01124 | 0.00167 | 94±112   | 206±11  | 215±7   | 226±33   |
| 67 | 126  | 91.9 | 1.38 | 0.0525  | 0.0052  | 0.1383  | 0.01234 | 0.01908 | 0.00072 | 0.0063  | 0.00043 | 307±186  | 132±11  | 122±5   | 127±9    |
| 68 | 196  | 184  | 1.06 | 0.05188 | 0.00442 | 0.13523 | 0.01038 | 0.01919 | 0.00076 | 0.00619 | 0.00043 | 280±152  | 129±9   | 123±5   | 125±9    |
| 69 | 133  | 72.4 | 1.84 | 0.0632  | 0.00289 | 1.10743 | 0.05209 | 0.12532 | 0.00429 | 0.03416 | 0.00161 | 715±70   | 757±25  | 761±25  | 679±31   |
| 70 | 522  | 274  | 1.91 | 0.0492  | 0.00297 | 0.1281  | 0.0074  | 0.01892 | 0.00064 | 0.00549 | 0.00027 | 157±109  | 122±7   | 121±4   | 111±5    |
| 71 | 80.1 | 258  | 0.31 | 0.10769 | 0.00382 | 4.75026 | 0.17187 | 0.31515 | 0.01041 | 0.08089 | 0.00368 | 1761±28  | 1776±30 | 1766±51 | 1572±69  |
| 72 | 99.2 | 81.6 | 1.22 | 0.05938 | 0.00282 | 1.02394 | 0.04826 | 0.12421 | 0.00415 | 0.03391 | 0.00169 | 581±74   | 716±24  | 755±24  | 674±33   |
| 73 | 116  | 70.9 | 1.64 | 0.05612 | 0.00909 | 0.14239 | 0.01691 | 0.0203  | 0.00099 | 0.00545 | 0.00053 | 457±247  | 135±15  | 130±6   | 110±11   |
| 74 | 265  | 269  | 0.98 | 0.04624 | 0.00267 | 0.12757 | 0.00703 | 0.01988 | 0.00064 | 0.00601 | 0.00034 | 10±96    | 122±6   | 127±4   | 121±7    |
| 75 | 44.0 | 34.8 | 1.26 | 0.05696 | 0.00801 | 0.15309 | 0.0173  | 0.02056 | 0.00101 | 0.00624 | 0.00064 | 490±232  | 145±15  | 131±6   | 126±13   |
| 76 | 16.2 | 19.3 | 0.84 | 0.07286 | 0.00513 | 1.21846 | 0.08007 | 0.12288 | 0.005   | 0.03115 | 0.00244 | 1010±107 | 809±37  | 747±29  | 620±48   |
| 77 | 409  | 414  | 0.99 | 0.04797 | 0.00199 | 0.25056 | 0.01055 | 0.03724 | 0.00119 | 0.01076 | 0.00052 | 98±64    | 227±9   | 236±7   | 216±10   |
| 78 | 496  | 395  | 1.25 | 0.06237 | 0.00232 | 1.0963  | 0.042   | 0.12474 | 0.004   | 0.03741 | 0.00164 | 687±46   | 752±20  | 758±23  | 742±32   |
| 79 | 5.55 | 131  | 0.04 | 0.04674 | 0.00301 | 0.22155 | 0.0136  | 0.03377 | 0.00116 | 0.01375 | 0.00327 | 36±111   | 203±11  | 214±7   | 276±65   |
| 80 | 102  | 95.7 | 1.07 | 0.06339 | 0.00295 | 1.10429 | 0.04887 | 0.12632 | 0.00422 | 0.03711 | 0.00195 | 721±63   | 755±24  | 767±24  | 736±38   |
| 81 | 13.6 | 138  | 0.10 | 0.05207 | 0.00342 | 0.24654 | 0.01526 | 0.03472 | 0.00114 | 0.00856 | 0.00149 | 289±123  | 224±12  | 220±7   | 172±30   |
| 82 | 24.9 | 390  | 0.06 | 0.04772 | 0.00212 | 0.2333  | 0.01022 | 0.03518 | 0.00111 | 0.01005 | 0.00155 | 85±69    | 213±8   | 223±7   | 202±31   |
| 83 | 113  | 62.8 | 1.80 | 0.05746 | 0.00804 | 0.14591 | 0.0177  | 0.01996 | 0.00097 | 0.008   | 0.00065 | 509±252  | 138±16  | 127±6   | 161±13   |
| 84 | 117  | 296  | 0.39 | 0.11382 | 0.0038  | 5.24818 | 0.18636 | 0.32942 | 0.01042 | 0.08273 | 0.00385 | 1861±30  | 1860±30 | 1836±51 | 1607±72  |
| 85 | 142  | 215  | 0.66 | 0.05159 | 0.00267 | 0.29256 | 0.02044 | 0.03913 | 0.0021  | 0.01359 | 0.00099 | 267±105  | 261±16  | 247±13  | 273±20   |
| 86 | 32.0 | 201  | 0.16 | 0.04968 | 0.0026  | 0.24226 | 0.01296 | 0.03519 | 0.00114 | 0.0136  | 0.00111 | 180±100  | 220±11  | 223±7   | 273±22   |
| 87 | 181  | 93.2 | 1.94 | 0.06472 | 0.00292 | 1.05219 | 0.04835 | 0.11749 | 0.00388 | 0.03511 | 0.00184 | 765±69   | 730±24  | 716±22  | 697±36   |
| 88 | 385  | 205  | 1.88 | 0.04557 | 0.00358 | 0.12356 | 0.00837 | 0.02003 | 0.00068 | 0.00616 | 0.00038 | -25±128  | 118±8   | 128±4   | 124±8    |
| 89 | 536  | 486  | 1.10 | 0.04865 | 0.00219 | 0.17082 | 0.00795 | 0.0252  | 0.00082 | 0.00774 | 0.00041 | 131±79   | 160±7   | 160±5   | 156±8    |
| 90 | 139  | 109  | 1.27 | 0.05341 | 0.00403 | 0.14785 | 0.01001 | 0.02046 | 0.00069 | 0.00659 | 0.00047 | 346±136  | 140±9   | 131±4   | 133±9    |
| 91 | 67.4 | 74.7 | 0.90 | 0.0612  | 0.00327 | 0.62831 | 0.03234 | 0.07495 | 0.0025  | 0.02775 | 0.00156 | 646±86   | 495±20  | 466±15  | 553±31   |
| 92 | 245  | 166  | 1.47 | 0.05524 | 0.00304 | 0.26457 | 0.01493 | 0.03417 | 0.00111 | 0.01039 | 0.00058 | 422±106  | 238±12  | 217±7   | 209±12   |
| 93 | 109  | 136  | 0.81 | 0.05076 | 0.00374 | 0.13754 | 0.00958 | 0.01963 | 0.00068 | 0.00548 | 0.00039 | 230±140  | 131±9   | 125±4   | 110±8    |

|    |      |      |      |         |         |         |         |         |         |         |         |         |         |         |          |
|----|------|------|------|---------|---------|---------|---------|---------|---------|---------|---------|---------|---------|---------|----------|
| 94 | 93.5 | 41.2 | 2.27 | 0.05574 | 0.00801 | 0.12921 | 0.01333 | 0.0198  | 0.00084 | 0.00656 | 0.00048 | 442±215 | 123±12  | 126±5   | 132±10   |
| 95 | 92.7 | 233  | 0.40 | 0.15005 | 0.00545 | 9.029   | 0.34491 | 0.42777 | 0.01433 | 0.12497 | 0.0058  | 2347±32 | 2341±35 | 2296±65 | 2380±104 |
| 96 | 253  | 228  | 1.11 | 0.15314 | 0.00537 | 8.93398 | 0.3283  | 0.41549 | 0.01353 | 0.12205 | 0.00523 | 2381±30 | 2331±34 | 2240±62 | 2328±94  |
| 97 | 248  | 531  | 0.47 | 0.05065 | 0.00211 | 0.22254 | 0.01171 | 0.03122 | 0.00141 | 0.00704 | 0.0004  | 225±64  | 204±10  | 198±9   | 142±8    |
| 98 | 222  | 112  | 1.99 | 0.05087 | 0.00564 | 0.13693 | 0.01463 | 0.0198  | 0.0008  | 0.00749 | 0.00085 | 235±226 | 130±13  | 126±5   | 151±17   |

---
